# Supplementary material for: mTOR–mLST8 interaction: hot spot identification through quantum biochemistry calculations
Source: Royal Society of Chemistry journal article supplement (doi:10.1039/d0nj04099a), 2020-01-01
Supplement: d0nj04099a5.pdf [file d0nj04099a5.pdf]

## **mTOR-mLST8 interaction: hot spots identification through quantum biochemistry calculations**

Francisco Lucas Santos de Oliveira <sup>a</sup>, Jaqueline Vieira Carletti <sup>c</sup>, Francisca Fernanda Azevedo <sup>b</sup>, Francisca Joseli Freitas de Sousa <sup>b</sup>, Ewerton W.S. Caetano <sup>d</sup>, Valder Nogueira Freire <sup>a</sup>, Geancarlo Zanatta <sup>a,b</sup>

<sup>a</sup> Department of Physics at Federal University of Ceará, 60455-760 Fortaleza, CE, Brazil;

<sup>b</sup> Postgraduate Research Program in Biochemistry at Federal University of Ceará, Fortaleza, CE, Brazil;

<sup>c</sup> Department of Physiology and Pharmacology, Federal University of Ceará, Brazil

<sup>d</sup> Federal Institute of Education, Science and Technology, 60040-531 Fortaleza, CE, Brazil.

*KEYWORDS: DFT, mTOR, mLST8, cancer, inhibitor, hot spots*

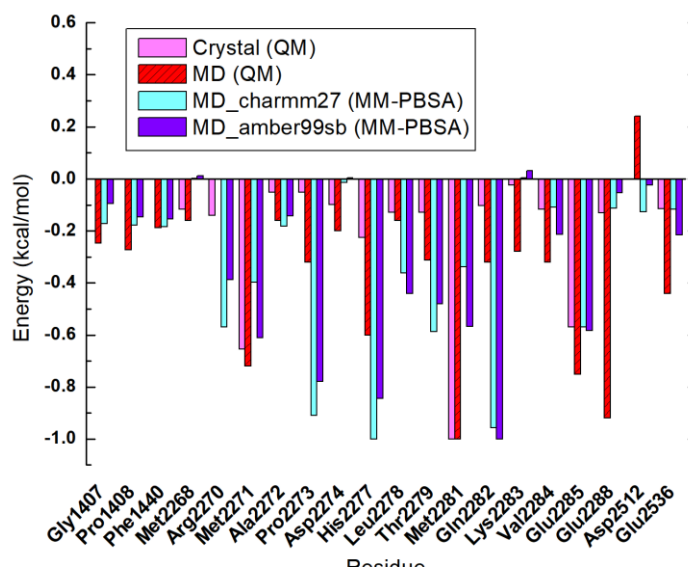

Supplementary figure S1 – Interaction strength of mTOR residues using MFCC-QM or MM-PBSA approach. MM-PBSA was calculated from simulations with charmm27 or amber99sb force fields. Calculations were performed using SAV model and  $\epsilon_{\text{solute}} = 40$ . To facilitate comparison between distinct methods, energy values were normalized.

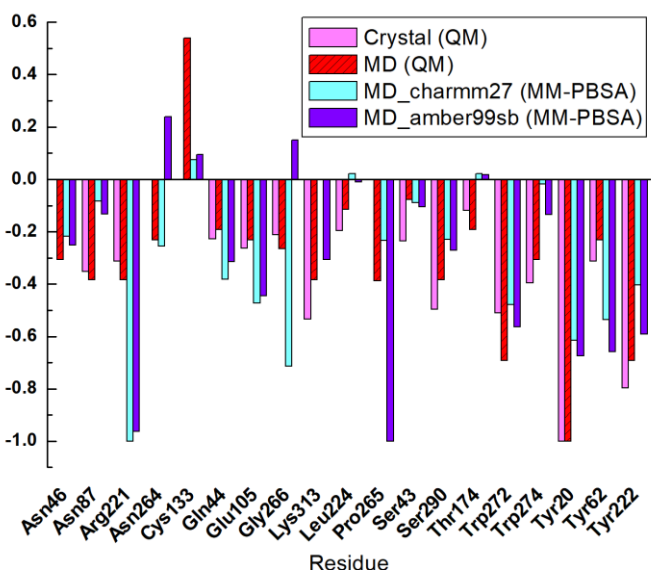

Supplementary figure S2 – Interaction strength of mLST8 residues using MFCC-QM or MM-PBSA approach. MM-PBSA was calculated from simulations with charmm27 or amber99sb force fields. Calculations were performed using SAV model and  $\epsilon_{\text{solute}} = 40$ . To facilitate comparison between distinct methods, energy values were normalized.

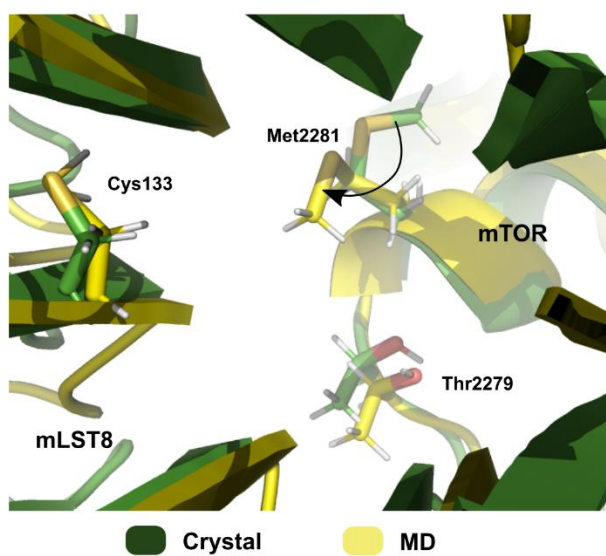

Supplementary figure S3 – Spatial relationship between residues Cys133 (mLST8) and Met2281(mTOR) in crystallographic (green) and MD (yellow) structures.

Table S1 – Calculated interaction energy (kcal.mol<sup>-1</sup>) of individual mTOR amino acid residues along the interface of mTOR-mLST8 crystallographic structure.

| mTOR    | mLST8  | E     | d   | mTOR    | mLST8  | E     | d   | mTOR    | mLST8  | E     | d   | mTOR    | mLST8   | E      | d     |     |
|---------|--------|-------|-----|---------|--------|-------|-----|---------|--------|-------|-----|---------|---------|--------|-------|-----|
| Ala2272 | Gly19  | 0.09  | 7.5 | Glu2285 | Tyr20  | -0.38 | 3.5 | Leu2280 | Gln44  | -0.02 | 8.0 | Phe2513 | Glu170  | 0.00   | 7.5   |     |
|         | Tyr20  | -2.30 | 3.0 |         | Arg221 | -1.72 | 5.0 |         | Asn46  | 0.01  | 7.5 | Pro2273 | Gly19   | 0.03   | 6.5   |     |
|         | Asp21  | -0.16 | 6.5 |         | Tyr222 | -0.01 | 6.0 |         | Lys86  | 0     | 8.0 |         | Tyr20   | -1.30  | 2.5   |     |
|         | His22  | -0.19 | 7.0 |         | Leu224 | -0.14 | 6.0 |         | Asn87  | -0.12 | 5.0 |         | Asp21   | 0.00   | 4.0   |     |
|         | Gln44  | -0.10 | 5.0 |         | Ser239 | 0.01  | 8.0 |         | Ala89  | -0.01 | 7.0 |         | His22   | -1.08  | 3.5   |     |
|         | Trp274 | -0.01 | 8.0 |         | Ala240 | 0.01  | 5.5 |         | Glu105 | -0.2  | 5.0 |         | Thr23   | -0.02  | 8.0   |     |
|         | Ser290 | -0.02 | 8.0 |         | Gln242 | -0.23 | 7.0 |         | Ala129 | 0     | 8.0 |         | Gln41   | -0.02  | 7.5   |     |
|         | Lys313 | 0.11  | 4.5 |         | Ile260 | 0.01  | 8.0 |         | Pro130 | -0.1  | 6.0 |         | Asp42   | -0.14  | 7.0   |     |
|         | Ala314 | -0.06 | 5.5 |         | Ser268 | 0.04  | 7.5 |         | Asn132 | -0.11 | 6.0 |         | Ser43   | 0.07   | 6.5   |     |
|         | Val316 | -0.01 | 7.5 |         | Ser269 | 0.04  | 5.0 |         | Gln148 | -1.09 | 3.0 |         | Gln44   | -0.16  | 5.0   |     |
| Ala2290 | Ser268 | -0.02 | 7.5 |         | Arg270 | -1.00 | 6.5 |         | Ser172 | -0.09 | 5.0 |         | Val45   | -0.02  | 8.0   |     |
| Ala2266 | Lys313 | 0.75  | 7.5 |         | Gly271 | -4.42 | 3.5 |         | Thr174 | 0     | 7.0 |         | Gln312  | 0.05   | 7.5   |     |
| Arg2270 | Tyr20  | -0.04 | 6.0 |         | Trp272 | -5.59 | 2.5 |         | Ser190 | -0.03 | 6.5 |         | Lys313  | 0.03   | 3.0   |     |
|         | Asp21  | -0.72 | 7.5 |         | Met273 | -2.22 | 6.5 |         | Tyr222 | -0.26 | 5.0 |         | Ala314  | -0.08  | 6.0   |     |
|         | Asn292 | -0.05 | 7.5 |         | Trp274 | -4.42 | 2.5 |         | Leu224 | -0.04 | 8.0 | Pro2372 | Lys86   | -0.06  | 7.0   |     |
|         | Gln312 | -0.18 | 6.5 |         | Ser289 | -1.43 | 6.5 |         | Trp272 | -0.04 | 6.0 | Ser2514 | Glu170  | -0.08  | 7.5   |     |
|         | Lys313 | -6.1  | 2.0 |         | Ser290 | -8.41 | 2.5 |         | Trp274 | 0.18  | 6.0 | Ser2534 | Tyr222  | -0.03  | 6.5   |     |
|         | Ala314 | -0.02 | 6.5 |         | Asp291 | 1.38  | 6.5 | Leu2527 | Glu170 | 0.03  | 7.5 | Thr2279 | Tyr20   | -0.08  | 6.0   |     |
| Asn2292 | Arg221 | 0.14  | 4.5 |         | Asn292 | 0.06  | 8.0 | Lys2283 | Tyr20  | -0.13 | 5.5 |         | Ser43   | -0.01  | 8.0   |     |
|         | Gly266 | 0.01  | 7.5 |         | Ala314 | -0.21 | 5.5 |         | Gln44  | -0.03 | 7.0 |         | Gln44   | -0.11  | 4.0   |     |
|         | Glu267 | -0.17 | 6.5 |         | Val315 | 0.07  | 7.0 |         | Asn46  | -0.08 | 8.0 |         | Val45   | -0.05  | 7.0   |     |
|         | Ser268 | -0.66 | 3.0 |         | Val316 | -0.06 | 5.0 |         | Tyr62  | -0.1  | 6.0 |         | Asn46   | -0.78  | 3.0   |     |
|         | Ser269 | 0.02  | 4.5 | Glu2288 | Arg221 | -4.94 | 2.5 |         | Lys86  | 1.26  | 7.5 |         | Ala47   | -0.02  | 7.5   |     |
|         | Arg270 | -0.02 | 7.5 |         | Tyr222 | -0.40 | 4.0 |         | Asn87  | 0.1   | 5.5 |         | Ala60   | -0.01  | 7.5   |     |
|         | Gly271 | 0.01  | 7.5 |         | Ala240 | -0.01 | 5.5 |         | Glu105 | -1.79 | 6.0 |         | Gly61   | -0.05  | 6.5   |     |
|         | Trp272 | -0.03 | 6.0 |         | Ser268 | 0.01  | 6.0 |         | Tyr222 | -0.07 | 8.0 |         | Tyr62   | -0.13  | 6.0   |     |
| Asn2293 | Gly266 | 0.01  | 8.0 |         | Ser269 | 0.04  | 5.5 |         | Trp272 | -0.12 | 6.0 |         | Gln63   | -0.01  | 8.0   |     |
|         | Glu267 | 0.06  | 6.0 |         | Trp272 | -1.28 | 2.5 |         | Trp274 | -0.16 | 5.5 |         | Lys86   | 0.10   | 6.5   |     |
|         | Ser268 | -2.09 | 2.5 | Glu2369 | Asn85  | -0.07 | 8.0 |         | Val316 | -0.02 | 8.0 |         | Asn87   | -2.53  | 3.0   |     |
|         | Ser269 | -0.1  | 5.5 |         | Lys86  | -1.52 | 7.0 | Lys2370 | Tyr62  | -0.16 | 5.0 |         | Ile88   | -0.08  | 5.5   |     |
|         | Arg270 | -0.13 | 6.5 | Glu2536 | Gln148 | -0.10 | 4.0 |         | Gln63  | -0.15 | 8.0 |         | Ala89   | -0.55  | 3.5   |     |
|         | Gly271 | 0.01  | 8.0 |         | Glu170 | 1.24  | 8.0 |         | Lys86  | 1.22  | 7.0 |         | Ser90   | -0.03  | 7.0   |     |
| Asn2537 | Tyr222 | -0.10 | 7.0 |         | Val171 | -0.22 | 7.5 | Lys2374 | Lys86  | 1.39  | 6.5 |         | Gly103  | -0.01  | 7.5   |     |
| Asp2274 | Gly19  | 0.01  | 6.5 |         | Ser172 | -0.20 | 5.5 |         | Glu105 | -1.39 | 8.0 |         | Gly104  | 0.00   | 7.0   |     |
|         | Tyr20  | 0.12  | 4.5 |         | Thr174 | -0.01 | 7.5 |         | Pro130 | 0     | 7.0 |         | Glu105  | -1.35  | 3.5   |     |
|         | Asp21  | 0.95  | 7.0 |         | Ser190 | 0.01  | 4.5 |         | Gln148 | -0.14 | 8.0 |         | Asp106  | -0.07  | 8.0   |     |
|         | His22  | -1.04 | 2.5 |         | Thr191 | 0.05  | 8.0 | Met2268 | Tyr20  | -4    | 6.5 |         | Pro130  | -0.03  | 7.0   |     |
|         | His40  | -0.05 | 6.5 |         | Tyr222 | -6.52 | 2.5 |         | Lys313 | -1.93 | 7.0 |         | Ile131  | -0.05  | 6.5   |     |
|         | Gln41  | -0.33 | 6.5 |         | Trp272 | -0.02 | 7.0 | Met2271 | Gly19  | -0.73 | 8.0 |         | Asn132  | -0.16  | 5.5   |     |
|         | Asp42  | 2.01  | 4.5 | His2277 | Tyr20  | -0.12 | 8.0 |         | Tyr20  | -5.25 | 2.5 |         | Gln148  | -0.14  | 6.5   |     |
|         | Ser43  | -5.11 | 3.0 |         | His22  | -0.03 | 7.0 |         | Asp21  | -2.49 | 6.5 |         | Ser172  | 0.00   | 8.0   |     |
|         | Gln44  | -0.42 | 2.5 |         | Asp42  | -0.28 | 4.0 |         | Gln44  | -2.04 | 7.5 |         | Thr174  | -0.04  | 7.5   |     |
|         | Val45  | 0.07  | 7.0 |         | Ser43  | -0.30 | 4.5 |         | Ser269 | -1.24 | 7.0 |         | Leu224  | -0.03  | 7.5   |     |
|         | Asn46  | 0.05  | 8.0 |         | Gln44  | -1.61 | 2.5 |         | Arg270 | -2.69 | 7.5 |         | Trp272  | -0.02  | 7.0   |     |
|         | Tyr62  | -0.09 | 6.0 |         | Asn46  | -0.15 | 5.0 |         | Gly271 | -0.62 | 5.0 |         | Trp274  | -0.21  | 5.0   |     |
|         | His64  | 0.05  | 7.5 |         | Gly61  | -0.13 | 6.5 |         | Trp272 | -0.15 | 5.5 |         | Val136  | -0.07  | 5.5   |     |
|         | Asn87  | -0.02 | 6.5 |         | Tyr62  | -6.36 | 3.0 |         | Trp274 | -0.08 | 5.5 |         | Thr2294 | Ser268 | -0.03 | 6.5 |
|         | Lys313 | -1.23 | 6.5 |         | Gln63  | -0.18 | 6.0 |         | Ser289 | -1.09 | 7.5 | Thr2275 | Tyr20   | -0.15  | 6.5   |     |
| Asp2276 | Gln44  | 0.05  | 6.5 |         | His64  | -0.05 | 7.0 |         | Ser290 | -1.85 | 3.0 |         | His22   | -0.05  | 7.5   |     |
|         | Tyr62  | -0.50 | 5.0 |         | Lys86  | -0.61 | 6.0 |         | Asp291 | -2.59 | 6.5 |         | Ser43   | -0.08  | 7.5   |     |
|         | Lys86  | -1.01 | 7.5 |         | Asn87  | -1.76 | 2.0 |         | Asn292 | -1.94 | 6.5 |         | Gln44   | -0.08  | 5.5   |     |
|         | Asn87  | 0.10  | 6.0 |         | Ile88  | 0.06  | 7.0 |         | Gln312 | -2.4  | 7.0 |         | Tyr62   | -0.05  | 8.0   |     |
|         | Glu105 | 1.13  | 7.5 |         | Glu105 | 0.19  | 5.5 |         | Lys313 | -4.36 | 3.5 |         | Asn87   | -0.05  | 7.0   |     |
| Cys2539 | Tyr222 | -3.81 | 7.0 | His2289 | Tyr20  | -0.05 | 7.5 |         | Ala314 | -1.51 | 3.5 | Val2284 | Tyr20   | -0.02  | 7.5   |     |
|         | Trp272 | -0.02 | 7.5 |         | Arg221 | -0.02 | 7.0 |         | Val315 | -1.88 | 7.0 |         | Gln148  | -0.02  | 8.0   |     |

|         |        |       |     |         |        |       |         |         |        |        |         |        |       |     |
|---------|--------|-------|-----|---------|--------|-------|---------|---------|--------|--------|---------|--------|-------|-----|
| Gln2282 | Ala18  | -0.02 | 7.5 | Glu267  | -0.06  | 6.0   | Val316  | -0.05   | 6.5    | Ser190 | -0.03   | 7.5    |       |     |
|         | Gly19  | -0.04 | 5.5 | Ser268  | -0.30  | 4.5   | Met2281 | Tyr20   | -3.88  | 6.5    | Arg211  | -0.04  | 5.5   |     |
|         | Tyr20  | -2.29 | 3.0 | Ser269  | -0.11  | 4.0   |         | Asn46   | -2.00  | 7.5    | Tyr222  | -2.40  | 2.5   |     |
|         | Ser43  | -0.07 | 6.5 | Arg270  | -0.11  | 5.5   |         | Asn87   | -1.99  | 7.5    | Leu224  | -0.04  | 7.0   |     |
|         | Gln44  | 0.44  | 3.0 | Gly271  | -0.02  | 6.5   |         | Ala89   | -1.25  | 7.0    | Ala240  | -0.03  | 6.0   |     |
|         | Val45  | 0.16  | 4.0 | Trp272  | -0.13  | 6.5   |         | Glu105  | -3.52  | 7.5    | Trp272  | -3.26  | 2.5   |     |
|         | Asn46  | -0.06 | 2.5 | Ser290  | -0.03  | 7.0   |         | Pro130  | -1.76  | 8.0    | Trp274  | -0.07  | 6.0   |     |
|         | Ala47  | -0.08 | 6.0 | Asp291  | -0.02  | 8.0   |         | Asn132  | -0.32  | 5.0    | Val2286 | Tyr20  | -1.07 | 3.0 |
|         | Ala60  | -0.04 | 6.5 | His2535 | Arg221 | 1.38  | 6.5     | Gln148  | -2.34  | 5.5    |         | Gln44  | -0.02 | 7.0 |
|         | Gly61  | -0.03 | 6.0 |         | Tyr222 | -0.10 | 5.0     | Ser172  | -1.46  | 5.0    |         | Trp272 | 0.02  | 6.0 |
|         | Tyr62  | -0.05 | 7.0 |         | Trp272 | -0.03 | 6.0     | Ile173  | -2.41  | 7.0    |         | Trp274 | -0.10 | 5.5 |
|         | Asn87  | -0.15 | 4.5 | Ile2267 | Ser268 | -0.02 | 8.0     | Thr174  | -2.77  | 3.0    |         | Ser290 | -0.10 | 6.5 |
|         | Ile88  | -0.04 | 7.0 |         | Lys313 | -0.26 | 7.0     | Ser175  | -1.08  | 7.5    |         | Lys313 | -0.04 | 8.0 |
|         | Ala89  | -0.06 | 6.5 | Leu2269 | Tyr20  | -0.03 | 7.0     | Val188  | -1.75  | 8.0    |         | Ala314 | -0.04 | 6.0 |
|         | Glu105 | -0.02 | 7.0 |         | Lys313 | 0.30  | 4.0     | Asn189  | -1.79  | 7.0    |         | Val316 | -0.02 | 7.5 |
|         | Asn132 | -0.03 | 8.0 | Leu2278 | Gly19  | -0.04 | 7.0     | Ser190  | -1.71  | 4.5    | Val2291 | Ser268 | -0.12 | 7.5 |
|         | Thr174 | -0.03 | 8.0 |         | Tyr20  | -2.82 | 3.0     | Thr191  | -1.63  | 8.0    |         |        |       |     |
|         | Tyr222 | -0.04 | 8.0 |         | His22  | -0.02 | 8.0     | Arg221  | -2.24  | 7.0    |         |        |       |     |
|         | Leu224 | -0.10 | 6.0 |         | Ser43  | -0.11 | 6.5     | Tyr222  | -5.23  | 2.5    |         |        |       |     |
|         | Ala240 | -0.01 | 8.0 |         | Gln44  | -1.34 | 2.0     | Ala223  | -1.28  | 5.5    |         |        |       |     |
|         | Trp272 | -0.02 | 4.5 |         | Val45  | -0.04 | 6.0     | Leu224  | -4.31  | 3.0    |         |        |       |     |
|         | Trp274 | -2.98 | 2.5 |         | Asn46  | -0.18 | 5.0     | Ser239  | -0.04  | 7.5    |         |        |       |     |
|         | Ser290 | -0.07 | 6.5 |         | Gly61  | -0.07 | 7.5     | Ala240  | -1.36  | 4.5    |         |        |       |     |
|         | Ala314 | -0.04 | 7.0 |         | Tyr62  | 0.01  | 5.0     | Trp272  | -1.42  | 2.5    |         |        |       |     |
|         | Val315 | 0.20  | 7.0 |         | Lys86  | -0.12 | 7.0     | Trp274  | -1.47  | 2.5    |         |        |       |     |
|         | Val316 | 0.44  | 2.0 |         | Asn87  | -1.96 | 3.0     | Ser290  | -1.36  | 8.0    |         |        |       |     |
|         | Cys317 | -0.14 | 5.0 |         | Ile88  | -0.04 | 8.0     | Val316  | 0.02   | 7.0    |         |        |       |     |
| Gln2540 | Lys86  | -0.26 | 7.0 |         | Glu105 | 0.48  | 4.5     | Met2287 | Tyr20  | -0.04  | 8.0     |        |       |     |
|         | Glu105 | 0.22  | 6.5 |         | Trp274 | -0.10 | 6.5     |         | Tyr222 | -0.03  | 8.0     |        |       |     |
|         | Pro130 | -0.03 | 7.5 |         | Lys313 | 0.01  | 8.0     |         | Trp272 | -0.05  | 7.0     |        |       |     |
|         | Gln148 | -0.01 | 7.0 |         | Ala314 | -0.03 | 7.0     |         | Trp274 | -0.02  | 8.0     |        |       |     |
|         |        |       |     |         | Val316 | -0.12 | 5.0     | Phe2371 | Lys86  | 0.04   | 8.0     |        |       |     |

Table S2 – Calculated interaction energy (kcal.mol<sup>-1</sup>) of individual mLST8 amino acid residues along the interface of mTOR-mLST8 crystallographic structure.

| mLST8 | mTOR    | E     | d   | mLST8 | mTOR    | E     | d   | mLST8 | mTOR    | E     | d   | mLST8  | mTOR    | E     | d   |
|-------|---------|-------|-----|-------|---------|-------|-----|-------|---------|-------|-----|--------|---------|-------|-----|
| Tyr20 | Ala2272 | -2.30 | 3.0 | Gln44 | Ala2272 | -0.10 | 5.0 | His40 | Asp2274 | -0.05 | 6.5 | Asn132 | Gln2282 | -0.03 | 8.0 |
|       | Arg2270 | -0.04 | 6.0 |       | Asp2274 | -0.42 | 2.5 | Gln41 | Asp2274 | -0.33 | 6.5 |        | Leu2280 | -0.11 | 6.0 |
|       | Asp2274 | 0.12  | 4.5 |       | Asp2276 | 0.05  | 6.5 |       | Pro2273 | -0.02 | 7.5 |        | Met2281 | -0.32 | 5.0 |
|       | Gln2282 | -2.29 | 3.0 |       | Gln2282 | 0.44  | 3.0 | Asp42 | Asp2274 | 2.01  | 4.5 |        | Thr2279 | -0.16 | 5.5 |
|       | Glu2285 | -0.38 | 3.5 |       | His2277 | -1.61 | 2.5 |       | His2277 | -0.28 | 4.0 | Thr174 | Gln2282 | -0.03 | 8.0 |
|       | His2277 | -0.12 | 8.0 |       | Leu2278 | -1.34 | 2.0 |       | Pro2273 | -0.14 | 7.0 |        | Glu2536 | -0.01 | 7.5 |
|       | His2289 | -0.05 | 7.5 |       | Leu2280 | -0.02 | 8.0 | Ser43 | Asp2274 | -5.11 | 3.0 |        | Leu2280 | 0.00  | 7.0 |
|       | Leu2269 | -0.03 | 7.0 |       | Lys2283 | -0.03 | 7.0 |       | Gln2282 | -0.07 | 6.5 |        | Met2281 | -2.77 | 3.0 |
|       | Leu2278 | -2.82 | 3.0 |       | Met2271 | -2.04 | 7.5 |       | His2277 | -0.30 | 4.5 |        | Thr2279 | -0.04 | 7.5 |
|       | Lys2283 | -0.13 | 5.5 |       | Pro2273 | -0.16 | 5.0 |       | Leu2278 | -0.11 | 6.5 | Leu224 | Gln2282 | -0.10 | 6.0 |
|       | Met2268 | -4.00 | 6.5 |       | Thr2279 | -0.11 | 4.0 |       | Pro2273 | 0.07  | 6.5 |        | Glu2285 | -0.14 | 6.0 |
|       | Met2271 | -5.25 | 2.5 |       | Tyr2275 | -0.08 | 5.5 |       | Thr2279 | -0.01 | 8.0 |        | Leu2280 | -0.04 | 8.0 |
|       | Met2281 | -3.88 | 6.5 |       | Val2286 | -0.02 | 7.0 |       | Tyr2275 | -0.08 | 7.5 |        | Met2281 | -4.31 | 3.0 |

|        |                   |        |                   |        |                   |        |                          |
|--------|-------------------|--------|-------------------|--------|-------------------|--------|--------------------------|
|        | Met2287 -0.04 8.0 | Trp274 | Ala2272 -0.01 8.0 | Val45  | Asp2274 0.07 7.0  |        | Thr2279 -0.03 7.5        |
|        | Pro2273 -1.30 2.5 |        | Gln2282 -2.98 2.5 |        | Gln2282 0.16 4.0  |        | Val2284 -0.04 7.0        |
|        | Thr2279 -0.08 6.0 |        | Glu2285 -4.42 2.5 |        | Leu2278 -0.04 6.0 | Ala240 | Gln2282 -0.01 8.0        |
|        | Tyr2275 -0.15 6.5 |        | Leu2278 -0.10 6.5 |        | Pro2273 -0.02 8.0 |        | Glu2285 0.01 5.5         |
|        | Val2284 -0.02 7.5 |        | Leu2280 0.18 6.0  |        | Thr2279 -0.05 7.0 |        | Glu2288 -0.01 5.5        |
|        | Val2286 -1.07 3.0 |        | Lys2283 -0.16 5.5 | Asn46  | Asp2274 0.05 8.0  |        | Met2281 -1.36 4.5        |
| Tyr222 | Asn2537 -0.10 7.0 |        | Met2271 -0.08 5.5 |        | Gln2282 -0.06 2.5 |        | Val2284 -0.03 6.0        |
|        | Cys2539 -3.81 7.0 |        | Met2281 -1.47 2.5 |        | His2277 -0.15 5.0 | Val315 | Gln2282 0.20 7.0         |
|        | Gln2282 -0.04 8.0 |        | Met2287 -0.02 8.0 |        | Leu2278 -0.18 5.0 |        | Glu2285 0.07 7.0         |
|        | Glu2285 -0.01 6.0 |        | Thr2279 -0.21 5.0 |        | Leu2280 0.01 7.5  |        | Met2271 -1.88 7.0        |
|        | Glu2288 -0.40 4.0 |        | Val2284 -0.07 6.0 |        | Lys2283 -0.08 8.0 | Cys317 | Gln2282 -0.14 5.0        |
|        | Glu2536 -6.52 2.5 |        | Val2286 -0.10 5.5 |        | Met2281 -2.00 7.5 | Pro130 | Glu2540 -0.03 7.5        |
|        | His2535 -0.10 5.0 | Ala314 | Ala2272 -0.06 5.5 |        | Thr2279 -0.78 3.0 |        | Leu2280 -0.10 6.0        |
|        | Leu2280 -0.26 5.0 |        | Arg2270 -0.02 6.5 | Tyr62  | Asp2274 -0.09 6.0 |        | Lys2374 0.00 7.0         |
|        | Lys2283 -0.07 8.0 |        | Gln2282 -0.04 7.0 |        | Asp2276 -0.50 5.0 |        | Met2281 -1.76 8.0        |
|        | Met2281 -5.23 2.5 |        | Glu2285 -0.21 5.5 |        | Gln2282 -0.05 7.0 |        | Thr2279 -0.03 7.0        |
|        | Met2287 -0.03 8.0 |        | Leu2278 -0.03 7.0 |        | His2277 -6.36 3.0 | Gln148 | Gln2540 -0.01 7.0        |
|        | Ser2534 -0.03 6.5 |        | Met2271 -1.51 3.5 |        | Leu2278 0.01 5.0  |        | Glu2536 -0.10 4.0        |
|        | Val2284 -2.40 2.5 |        | Pro2273 -0.08 6.0 |        | Lys2283 -0.10 6.0 |        | Leu2280 -1.09 3.0        |
| Lys313 | Ala2272 0.11 4.5  | Val316 | Val2286 -0.04 6.0 |        | Lys2370 -0.16 5.0 |        | Lys2374 -0.14 8.0        |
|        | Ala2266 0.75 7.5  |        | Ala2272 -0.01 7.5 |        | Thr2279 -0.13 6.0 |        | Met2281 -2.34 5.5        |
|        | Arg2270 -6.10 2.0 |        | Gln2282 0.44 2.0  |        | Tyr2275 -0.05 8.0 |        | Thr2279 -0.14 6.5        |
|        | Asp2274 -1.23 6.5 |        | Glu2285 -0.06 5.0 | His64  | Asp2274 0.05 7.5  |        | Val2284 -0.02 8.0        |
|        | Ile2267 -0.26 7.0 |        | Leu2278 -0.12 5.0 |        | His2277 -0.05 7.0 | Ser239 | Glu2285 0.01 8.0         |
|        | Leu2269 0.30 4.0  |        | Lys2283 -0.02 8.0 | Asn87  | Asp2274 -0.02 6.5 |        | Met2281 -0.04 7.5        |
|        | Leu2278 0.01 8.0  |        | Met2271 -0.05 6.5 |        | Asp2276 0.10 6.0  | Gln242 | Glu2285 -0.23 7.0        |
|        | Met2268 -1.93 7.0 |        | Met2281 0.02 7.0  |        | Gln2282 -0.15 4.5 | Ile260 | Glu2285 0.01 8.0         |
|        | Met2271 -4.36 3.5 |        | Thr2279 -0.07 5.5 |        | His2277 -1.76 2.0 | Met273 | Glu2285 -2.22 6.5        |
|        | Pro2273 0.03 3.0  |        | Val2286 -0.02 7.5 |        | Leu2278 -1.96 3.0 | Ser289 | Glu2285 -1.43 6.5        |
|        | Val2286 -0.04 8.0 | Ser268 | Ala2290 -0.02 7.5 |        | Leu2280 -0.12 5.0 |        | Met2271 -1.09 7.5        |
| Ser290 | Ala2272 -0.02 8.0 |        | Asn2292 -0.66 3.0 |        | Lys2283 0.10 5.5  | Asp291 | Glu2285 1.38 6.5         |
|        | Gln2282 -0.07 6.5 |        | Asn2293 -2.09 2.5 |        | Met2281 -1.99 7.5 |        | His2289 -0.02 8.0        |
|        | Glu2285 -8.41 2.5 |        | Glu2285 0.04 7.5  |        | Thr2279 -2.53 3.0 |        | Met2271 -2.59 6.5        |
|        | His2289 -0.03 7.0 |        | Glu2288 0.01 6.0  |        | Tyr2275 -0.05 7.0 | Asn85  | Glu2369 -0.07 8.0        |
|        | Met2271 -1.85 3.0 |        | His2289 -0.30 4.5 | Lys86  | Asp2276 -1.01 7.5 | Glu170 | Glu2536 1.24 8.0         |
|        | Met2281 -1.36 8.0 |        | Ile2267 -0.02 8.0 |        | Gln2540 -0.26 7.0 |        | Leu2527 0.03 7.5         |
|        | Val2286 -0.10 6.5 |        | Thr2294 -0.03 6.5 |        | Glu2369 -1.52 7.0 |        | Phe2513 0.00 7.5         |
| Trp272 | Asn2292 -0.03 6.0 |        | Val2291 -0.12 7.5 |        | His2277 -0.61 6.0 |        | Ser2514 -0.08 7.5        |
|        | Cys2539 -0.02 7.5 | Asn292 | Arg2270 -0.05 7.5 |        | Leu2278 -0.12 7.0 | Val171 | Glu2536 -0.22 7.5        |
|        | Gln2282 -0.02 4.5 |        | Glu2285 0.06 8.0  |        | Leu2280 0.00 8.0  | Ser172 | Glu2536 -0.20 5.5        |
|        | Glu2285 -5.59 2.5 |        | Met2271 -1.94 6.5 |        | Lys2283 1.26 7.5  |        | Leu2280 -0.09 5.0        |
|        | Glu2288 -1.28 2.5 | Gln312 | Arg2270 -0.18 6.5 |        | Lys2370 1.22 7.0  |        | Met2281 -1.46 5.0        |
|        | Glu2536 -0.02 7.0 |        | Met2271 -2.40 7.0 |        | Lys2374 1.39 6.5  |        | Thr2279 0.00 8.0         |
|        | His2289 -0.13 6.5 |        | Pro2273 0.05 7.5  |        | Phe2371 0.04 8.0  | Ser190 | Glu2536 0.01 4.5         |
|        | His2535 -0.03 6.0 | Arg221 | Asn2292 0.14 4.5  |        | Pro2372 -0.06 7.0 |        | Leu2280 -0.03 6.5        |
|        | Leu2280 -0.04 6.0 |        | Glu2285 -1.72 5.0 |        | Thr2279 0.10 6.5  |        | Met2281 -1.71 4.5        |
|        | Lys2283 -0.12 6.0 |        | Glu2288 -4.94 2.5 | Glu105 | Asp2276 1.13 7.5  |        | Val2284 -0.03 7.5        |
|        | Met2271 -0.15 5.5 |        | His2289 -0.02 7.0 |        | Gln2282 -0.02 7.0 | Thr191 | Glu2536 0.05 8.0         |
|        | Met2281 -1.42 2.5 |        | His2535 1.38 6.5  |        | Gln2540 0.22 6.5  |        | Met2281 -1.63 8.0        |
|        | Met2287 -0.05 7.0 |        | Met2281 -2.24 7.0 |        | His2277 0.19 5.5  | Ala129 | Leu2280 0.00 8.0         |
|        | Thr2279 -0.02 7.0 |        | Val2284 -0.04 5.5 |        | Leu2278 0.48 4.5  | Gln63  | His2277 -0.18 6.0        |
|        | Val2284 -3.26 2.5 | Gly266 | Asn2292 0.01 7.5  |        | Leu2280 -0.20 5.0 |        | Lys2370 -0.15 8.0        |
|        | Val2286 0.02 6.0  |        | Asn2293 0.01 8.0  |        | Lys2283 -1.79 6.0 |        | Thr2279 -0.01 8.0        |
| Gly19  | Ala2272 0.09 7.5  | Glu267 | Asn2292 -0.17 6.5 |        | Lys2374 -1.39 8.0 |        | Ile173 Met2281 -2.41 7.0 |
|        | Asp2274 0.01 6.5  |        | Asn2293 0.06 6.0  |        | Met2281 -3.52 7.5 | Ser175 | Met2281 -1.08 7.5        |
|        | Gln2282 -0.04 5.5 |        | His2289 -0.06 6.0 |        | Thr2279 -1.35 3.5 | Val188 | Met2281 -1.75 8.0        |
|        | Leu2278 -0.04 7.0 | Ser269 | Asn2292 0.02 4.5  | Ala18  | Gln2282 -0.02 7.5 | Asn189 | Met2281 -1.79 7.0        |
|        | Met2271 -0.73 8.0 |        | Asn2293 -0.10 5.5 | Ala47  | Gln2282 -0.08 6.0 | Ala223 | Met2281 -1.28 5.5        |
|        | Pro2273 0.03 6.5  |        | Glu2285 0.04 5.0  |        | Thr2279 -0.02 7.5 | Thr23  | Pro2273 -0.02 8.0        |
| Asp21  | Ala2272 -0.16 6.5 |        | Glu2288 0.04 5.5  | Ala60  | Gln2282 -0.04 6.5 | Ser90  | Thr2279 -0.03 7.0        |
|        | Arg2270 -0.72 7.5 |        | His2289 -0.11 4.0 |        | Thr2279 -0.01 7.5 | Gly103 | Thr2279 -0.01 7.5        |
|        | Asp2274 0.95 7.0  |        | Met2271 -1.24 7.0 | Gly61  | Gln2282 -0.03 6.0 | Gly104 | Thr2279 0.00 7.0         |

|       |                   |                          |                         |                          |
|-------|-------------------|--------------------------|-------------------------|--------------------------|
|       | Met2271 -2.49 6.5 | Arg270 Asn2292 -0.02 7.5 | His2277 -0.13 6.5       | Asp106 Thr2279 -0.07 8.0 |
|       | Pro2273 0.00 4.0  | Asn2293 -0.13 6.5        | Leu2278 -0.07 7.5       | Ile131 Thr2279 -0.05 6.5 |
| His22 | Ala2272 -0.19 7.0 | Glu2285 -1.00 6.5        | Thr2279 -0.05 6.5       | Gly192 Met2281 0.00 8.5  |
|       | Asp2274 -1.04 2.5 | His2289 -0.11 5.5        | Ile88 Gln2282 -0.04 7.0 | Asp192 Met2281 13.0 8.5  |
|       | His2277 -0.03 7.0 | Met2271 -2.69 7.5        | His2277 0.06 7.0        |                          |
|       | Leu2278 -0.02 8.0 | Gly271 Asn2292 0.01 7.5  | Leu2278 -0.04 8.0       |                          |
|       | Pro2273 -1.08 3.5 | Asn2293 0.01 8.0         | Thr2279 -0.08 5.5       |                          |
|       | Tyr2275 -0.05 7.5 | Glu2285 -4.42 3.5        | Ala89 Gln2282 -0.06 6.5 |                          |
|       |                   | His2289 -0.02 6.5        | Leu2280 -0.01 7.0       |                          |
|       |                   | Met2271 -0.62 5.0        | Met2281 -1.25 7.0       |                          |
|       |                   |                          | Thr2279 -0.55 3.5       |                          |

Table S3 – Calculated interaction energy (kcal.mol<sup>-1</sup>) of mTOR amino acid residues along the interface of mTOR-mLST8 MD structure.

| mTOR    | mLST8  | E     | d   | mTOR    | mLST8  | E     | d   | mTOR    | mLST8  | E     | d   | mTOR    | mLST8  | E   | d   |
|---------|--------|-------|-----|---------|--------|-------|-----|---------|--------|-------|-----|---------|--------|-----|-----|
| Glu1403 | Asn264 | -1.00 | 6.5 | Ala2272 | Gly19  | 0.00  | 7.0 | Met2281 | Tyr20  | -3.00 | 6.5 | Glu2288 | Arg221 | -15 | 2   |
|         | Gly266 | 1.00  | 8.0 |         | Tyr20  | -3.00 | 3.0 |         | Asn46  | -1.00 | 7.0 |         | Tyr222 | 0   | 5.5 |
|         | Glu267 | 1.00  | 7.5 |         | Asp21  | -1.00 | 6.5 |         | Ala89  | -1.00 | 5.5 |         | Leu224 | 0   | 8   |
| Phe1404 | Asn264 | 0.00  | 7.5 |         | His22  | 1.00  | 7.0 |         | Ser90  | 0.00  | 6.5 |         | Ala240 | 0   | 4   |
|         | Gly266 | 0.00  | 6.0 |         | Gln44  | 0.00  | 5.0 |         | Glu105 | -2.00 | 8.0 |         | Asp241 | 2   | 6   |
|         | Glu267 | 1.00  | 7.0 |         | Val45  | 0.00  | 8.0 |         | Pro130 | -2.00 | 8.0 |         | Gln242 | 0   | 7.5 |
| Gln1405 | Gly266 | 0.00  | 7.5 |         | Asn46  | 0.00  | 7.5 |         | Ile131 | -2.00 | 6.5 |         | Ser268 | 0   | 7.5 |
|         | Glu267 | 0.00  | 6.5 |         | Ser290 | 0.00  | 8.0 |         | Asn132 | -1.00 | 3.0 |         | Ser269 | 0   | 3.5 |
|         | Ser268 | 1.00  | 8.0 |         | Lys313 | -1.00 | 3.5 |         | Cys133 | 14.00 | 5.5 |         | Arg270 | -1  | 6.5 |
|         | Arg270 | 1.00  | 7.0 |         | Ala314 | 0.00  | 5.5 |         | Gly146 | -1.00 | 7.5 |         | Gly271 | -1  | 5   |
| Lys1406 | Gly263 | 0     | 7.0 |         | Val316 | 0.00  | 6.5 |         | Asp147 | -2.00 | 7.5 |         | Trp272 | -8  | 2   |
|         | Asn264 | 0     | 4.5 | Pro2273 | Gly19  | 0.00  | 5.5 |         | Gln148 | -2.00 | 4.5 |         | Trp274 | 0   | 7.5 |
|         | Pro265 | 0     | 8.0 |         | Tyr20  | -2.00 | 2.5 |         | Ser172 | -1.00 | 4.0 |         | Ser290 | 0   | 6.5 |
|         | Gly266 | 0     | 6.0 |         | Asp21  | 0.00  | 5.0 |         | Ile173 | -2.00 | 5.5 | His2289 | Tyr20  | 0   | 6.5 |
|         | Glu267 | -1    | 3.0 |         | His22  | -1.00 | 3.0 |         | Thr174 | -4.00 | 3.0 |         | Arg221 | 1   | 7.5 |
|         | Ser268 | 0     | 6.5 |         | Thr23  | 0.00  | 7.5 |         | Ser175 | -1.00 | 5.0 |         | Gln242 | 0   | 6.5 |
|         | Arg270 | 1     | 5.0 |         | His40  | -1.00 | 6.5 |         | Ala176 | -1.00 | 8.0 |         | Ser269 | 1   | 5.5 |
| Gly1407 | Lys261 | 0     | 7.0 |         | Gln41  | 0.00  | 7.0 |         | Val188 | -1.00 | 7.0 |         | Arg270 | 1   | 5.5 |
|         | Gly263 | -1    | 7.0 |         | Asp42  | 0.00  | 5.0 |         | Asn189 | -1.00 | 7.5 |         | Gly271 | -1  | 3.5 |
|         | Asn264 | -2    | 3.0 |         | Ser43  | -2.00 | 5.0 |         | Ser190 | -1.00 | 5.5 |         | Trp272 | 0   | 4.5 |
|         | Pro265 | -0.2  | 6.0 |         | Gln44  | -2.00 | 3.0 |         | Arg221 | -1.00 | 8.0 |         | Trp274 | 1   | 6   |
|         | Gly266 | -1    | 3.5 |         | Val45  | 0.00  | 6.0 |         | Tyr222 | -3.00 | 3.5 |         | Ser289 | 1   | 6.5 |
|         | Glu267 | -1    | 2.5 |         | Asn46  | -1.00 | 7.5 |         | Ala223 | 0.00  | 6.0 |         | Ser290 | 0   | 2.5 |
|         | Ser268 | 0     | 5.5 |         | Tyr62  | 0.00  | 7.0 |         | Leu224 | -5.00 | 3.5 |         | Asp291 | -3  | 4.5 |
|         | Arg270 | -1    | 5.5 |         | His64  | 0.00  | 8.0 |         | Gln225 | 0     | 6.5 |         | Asn292 | 0   | 5.5 |
| Pro1408 | Lys261 | 0     | 7.0 |         | Lys313 | -1.00 | 4.0 |         | Ala240 | -1    | 7.0 |         | Leu293 | 0   | 8   |
|         | Gly263 | 1     | 7.5 |         | Ala314 | 1.00  | 7.0 |         | Trp272 | 0     | 3.0 |         | Lys313 | 2   | 7.5 |
|         | Asn264 | -1    | 3.0 |         | Val316 | 1.00  | 7.5 |         | Trp274 | -1    | 2.5 |         | Ala314 | 0   | 4.5 |

|         |        |       |         |         |       |         |        |       |         |         |        |     |     |
|---------|--------|-------|---------|---------|-------|---------|--------|-------|---------|---------|--------|-----|-----|
| Pro265  | -2.6   | 3.5   | Asp2274 | Tyr20   | -1.00 | 5.5     | Val316 | 1     | 7.5     | Val315  | 1      | 7.5 |     |
| Gly266  | -3.9   | 2.5   | His22   | -2.00   | 5.5   | Gln2282 | Ala18  | 0.00  | 7.5     | Val316  | 0      | 8   |     |
| Glu267  | -0.3   | 4.5   | Asp42   | 1.00    | 5.5   | Gly19   | 1.00   | 5.5   | Ala2290 | Ser290  | 1      | 8   |     |
| Ser268  | 0      | 7.0   | Ser43   | -1.00   | 5.5   | Tyr20   | -3.00  | 2.0   | Val2291 | Arg221  | -1     | 7.5 |     |
| Thr1409 | Gly263 | 0.00  | 6.5     | Gln44   | 0.00  | 3.5     | Gln44  | 0.00  | 4.0     | Ser269  | 0      | 6   |     |
| Asn264  | -2     | 3.0   | Asn46   | 1.00    | 7.5   | Val45   | -1.00  | 4.5   | Asn2292 | Arg221  | 0      | 6.5 |     |
| Pro265  | 0      | 3.0   | Tyr62   | -1.00   | 6.0   | Asn46   | -4.00  | 2.0   | Ser268  | 0       | 5      |     |     |
| Gly266  | -1     | 4.5   | Asn87   | -1.00   | 7.0   | Ala47   | -1.00  | 6.5   | Ser269  | -1      | 3      |     |     |
| Glu267  | 0      | 7.0   | Lys313  | -1.00   | 7.5   | Ala60   | 0.00   | 7.5   | Arg270  | 0       | 5      |     |     |
| Pro1410 | Gly263 | 0     | 7.5     | Tyr2275 | Tyr20 | 0.00    | 7.5    | Gly61 | 1.00    | 7.0     | Gly271 | 0   | 6   |
| Asn264  | 1      | 5.0   | Gln44   | 1.00    | 6.5   | Tyr62   | 0.00   | 7.0   | Trp272  | 0       | 6.5    |     |     |
| Pro265  | -2     | 2.5   | Asn87   | 0.00    | 7.5   | Asn87   | 1.00   | 6.5   | Asn2293 | Ser269  | 0      | 6.5 |     |
| Gly266  | -1     | 5.0   | Asp2276 | Gln44   | 0.00  | 6.5     | Ile88  | 0.00  | 7.0     | Arg270  | 0      | 6   |     |
| Glu267  | 0      | 7.5   | Tyr62   | 0.00    | 6.5   | Ala89   | 0.00   | 6.0   | Gly271  | 1       | 6.5    |     |     |
| Ala1411 | Asn264 | 0     | 7.5     | Lys86   | -2.00 | 7.5     | Asn132 | 0.00  | 7.5     | Ser290  | 1      | 7   |     |
| Pro265  | -0.3   | 6.5   | Asn87   | 0.00    | 6.0   | Gln148  | 0.00   | 7.5   | Asp291  | 1       | 7.5    |     |     |
| Ile1412 | Asn264 | 0     | 5.5     | Glu105  | 1.00  | 6.5     | Thr174 | 0.00  | 8.0     | Asn292  | 1      | 8   |     |
| Pro265  | 0.1    | 7.0   | His2277 | Tyr20   | 0.00  | 7.0     | Tyr222 | 1.00  | 8.0     | Arg2503 | Glu170 | -1  | 7   |
| Gly266  | 0      | 7.5   | Asp42   | -2.00   | 6.5   | Leu224  | 1.00   | 6.0   | Arg2511 | Pro169  | -1     | 8   |     |
| Glu267  | -0.6   | 8.0   | Ser43   | 0.00    | 6.5   | Trp272  | 0.00   | 5.0   | Glu170  | -1      | 7      |     |     |
| Leu1413 | Asn264 | -1.00 | 7.5     | Gln44   | -1.00 | 2.5     | Trp274 | -3.00 | 3.0     | Asp2512 | Pro169 | 1   | 7   |
| Pro265  | -0.40  | 5.0   | Asn46   | 0.00    | 5.0   | Ser290  | 0.00   | 7.5   | Glu170  | 5       | 3.5    |     |     |
| Gly266  | 1.00   | 5.5   | Gly61   | 0.00    | 7.5   | Ala314  | 0.00   | 6.5   | Phe2513 | Pro169  | 0      | 5   |     |
| Tyr1435 | Lys261 | -1.00 | 7.5     | Tyr62   | -5.00 | 3.0     | Val315 | 1.00  | 7.5     | Glu170  | 3      | 3.5 |     |
| Asn264  | 0.00   | 8.0   | Gln63   | -1.00   | 5.5   | Val316  | -1.00  | 2.5   | Ser2514 | Pro169  | 1      | 5   |     |
| Pro265  | 0      | 6.0   | Lys86   | 1.00    | 6.0   | Cys317  | -1.00  | 6.0   | Glu170  | -1      | 6      |     |     |
| Gly266  | -1     | 3.5   | Asn87   | -3.00   | 2.0   | Lys2283 | Tyr20  | -1.00 | 5.5     | His2515 | Pro169 | -1  | 5   |
| Glu267  | 0.00   | 5.5   | Ile88   | -1.00   | 8.0   | Gln44   | 0.00   | 8.0   | Glu170  | -1      | 7      |     |     |
| Ser268  | 0.00   | 5.0   | Glu105  | -3.00   | 5.0   | Asn46   | -1.00  | 7.0   | Asp2516 | Glu168  | 2      | 8   |     |
| Ala1436 | Pro265 | 0.00  | 7.5     | Leu2278 | Gly19 | 1       | 8.0    | Asn87 | 0.00    | 7.5     | Pro169 | 0   | 5   |
| Gly266  | 0.00   | 7.5   | Tyr20   | -2      | 3.0   | Glu105  | -2.00  | 7.5   | Asp2517 | Pro169  | 0      | 8   |     |
| Met1437 | Thr220 | -1.00 | 8.0     | Ser43   | 1     | 8.0     | Gln148 | 0.00  | 8.0     | Glu2526 | Thr220 | 0   | 8   |
| Lys1438 | Thr220 | 1.00  | 5.0     | Gln44   | -1    | 3.0     | Tyr222 | 0.00  | 8.0     | Leu2527 | Glu170 | -1  | 7.5 |
| Arg221  | 2.00   | 7.5   | Val45   | 0       | 8.0   | Trp272  | -1.00  | 6.5   | Thr191  | 1       | 7      |     |     |
| Ser268  | 1.00   | 8.0   | Asn46   | 0       | 4.0   | Trp274  | -1.00  | 6.0   | Lys2530 | Val171  | 1      | 8   |     |
| His1439 | His219 | 1.00  | 7.5     | Tyr62   | 0     | 5.5     | Val316 | -1.00 | 7.5     | Ser190  | 0      | 7.5 |     |
| Thr220  | -1.00  | 5.0   | Lys86   | 0       | 7.5   | Val2284 | Tyr20  | 0.00  | 7.5     | Thr191  | 0      | 4.5 |     |
| Arg221  | 1.00   | 7.0   | Asn87   | -3      | 4.0   | Gln148  | 0.00   | 8.0   | Gly192  | 0       | 7.5    |     |     |
| Asp241  | -1.00  | 6.0   | Glu105  | 1       | 4.5   | Ser172  | -1.00  | 8.0   | Asn193  | 0       | 6.5    |     |     |
| Lys261  | 1.00   | 6.0   | Pro130  | 0       | 8.0   | Ser190  | 0.00   | 6.5   | His219  | 1       | 7.5    |     |     |
| Pro265  | 0.00   | 5.5   | Gln148  | 0       | 7.0   | Arg221  | -1.00  | 3.5   | Thr220  | 0       | 4      |     |     |
| Gly266  | 0.00   | 5.0   | Trp274  | -1      | 7.5   | Tyr222  | -2.00  | 3.0   | Arg221  | 2       | 5      |     |     |
| Glu267  | 0.00   | 7.5   | Ala314  | 0       | 8.0   | Leu224  | 0.00   | 6.0   | Tyr222  | -1      | 7.5    |     |     |
| Ser268  | 1.00   | 5.0   | Val316  | 0       | 6.0   | Ala240  | 0.00   | 6.0   | Gln2531 | Glu170  | -1     | 5.5 |     |



|         |        |       |         |         |       |         |         |       |         |         |         |        |     |     |
|---------|--------|-------|---------|---------|-------|---------|---------|-------|---------|---------|---------|--------|-----|-----|
| Ser269  | 0.00   | 7.5   | Thr2279 | Tyr20   | 0     | 6.0     | Trp272  | -4.00 | 2.5     | Thr2533 | Arg221  | 1      | 6   |     |
| Phe1440 | Lys261 | -1.00 | 4.0     | Gln44   | 0     | 4.5     | Trp274  | 0.00  | 5.5     | Tyr222  | 0       | 8      |     |     |
| Asn264  | 0.00   | 6.0   | Val45   | 0       | 8.0   | Glu2285 | Tyr20   | 0.00  | 4.0     | Ser2534 | Ser190  | 0      | 7.5 |     |
| Pro265  | -2.70  | 3.0   | Asn46   | -1      | 3.0   | Arg221  | -1.00   | 6.0   | Thr191  | 0       | 8       |        |     |     |
| Gly266  | -1.00  | 3.0   | Ala47   | 0       | 7.0   | Tyr222  | 0.00    | 7.0   | Arg221  | 0       | 4.5     |        |     |     |
| Glu267  | 0.00   | 5.5   | Gly61   | 0       | 6.0   | Leu224  | 0.00    | 5.5   | Tyr222  | 0       | 4.5     |        |     |     |
| Ser268  | 0.00   | 6.5   | Tyr62   | 0       | 5.5   | Ser239  | 0.00    | 7.5   | His2535 | Arg221  | 4       | 3      |     |     |
| Glu1442 | Pro217 | 1.00  | 8.0     | Lys86   | 0     | 6.5     | Ala240  | 0.00  | 5.5     | Tyr222  | 1       | 5      |     |     |
| Ala218  | 0.00   | 6.5   | Asn87   | -3      | 3.0   | Asp241  | 1.00    | 8.0   | Ala240  | 0       | 7       |        |     |     |
| His219  | -1.00  | 7.0   | Ile88   | 1       | 5.0   | Gln242  | 0.00    | 7.0   | Ser269  | 0       | 5.5     |        |     |     |
| Thr220  | 0      | 8.0   | Ala89   | -1      | 3.5   | Ser269  | 0.00    | 7.5   | Trp272  | -1      | 5       |        |     |     |
| Thr243  | -1     | 7.5   | Ser90   | -1      | 6.5   | Arg270  | 0.00    | 6.5   | Glu2536 | Asn132  | -1      | 8      |     |     |
| Lys245  | -2     | 4.5   | Gly103  | 0.2     | 7.5   | Gly271  | -1.00   | 3.5   | Gln148  | 0       | 6.5     |        |     |     |
| Trp247  | 1      | 7.5   | Gly104  | 1       | 6.5   | Trp272  | -5.00   | 2.5   | Glu170  | 2       | 8       |        |     |     |
| Leu254  | 0      | 5.0   | Glu105  | -1      | 3.5   | Met273  | -2.00   | 6.0   | Val171  | 0       | 7.5     |        |     |     |
| Glu257  | 1      | 5     | Asp106  | 0       | 8.0   | Trp274  | -2.00   | 3.0   | Ser172  | 0       | 5.5     |        |     |     |
| Leu1443 | Glu257 | 0.00  | 7.5     | Pro130  | 0     | 6.0     | Ser289  | 0.20  | 7.0     | Thr174  | 0       | 7.5    |     |     |
| Ser259  | 0.00   | 8.0   | Ile131  | -1      | 6.0   | Ser290  | -9.00   | 2.0   | Ser190  | 0       | 4.5     |        |     |     |
| Lys261  | 0.00   | 5.5   | Asn132  | -1      | 5.0   | Asp291  | 1.00    | 6.5   | Thr191  | 0       | 8       |        |     |     |
| Asn264  | 0.00   | 7.5   | Gln148  | -1      | 5.0   | Asn292  | 0.00    | 8.0   | Arg221  | -1      | 4.5     |        |     |     |
| Pro265  | -1.00  | 3.5   | Ser172  | 0       | 8.0   | Ala314  | 0.00    | 4.5   | Tyr222  | -11     | 2       |        |     |     |
| Gly266  | 0.00   | 7.0   | Trp272  | 0       | 8.0   | Val315  | 0.00    | 7.5   | Trp272  | 0       | 6       |        |     |     |
| Glu1444 | Pro265 | -1.00 | 8.0     | Trp274  | 0     | 6.5     | Val316  | -1.00 | 5.5     | Asn2537 | Arg221  | 0      | 7   |     |
| Trp1449 | Pro265 | 0.00  | 8.0     | Val316  | 0     | 6.5     | Val2286 | Tyr20 | -2.00   | 3.0     | Tyr222  | 0      | 6   |     |
| Ile2267 | Lys313 | 0.00  | 6.5     | Leu2280 | Asn46 | -1      | 7.0     | Gln44 | 0.00    | 7.5     | Leu2538 | Arg221 | 0   | 7.5 |
| Met2268 | Tyr20  | -3.00 | 8.0     | Asn87   | -1    | 6.5     | Gly271  | 0.00  | 7.5     | Cys2539 | Tyr222  | -3     | 7   |     |
| Lys313  | -1.00  | 7.0   | Ala89   | 0       | 7.0   | Trp272  | 0.00    | 6.5   | Trp272  | 0       | 7.5     |        |     |     |
| Leu2269 | Tyr20  | -1.00 | 7.5     | Glu105  | 0     | 5.0     | Trp274  | 0.00  | 5.5     | Gln2540 | Gln148  | 0      | 6.5 |     |
| Lys313  | 0.00   | 5.5   | Ala129  | 0       | 8.0   | Ser290  | -1      | 6     | Tyr222  | 0       | 7       |        |     |     |
| Arg2270 | Tyr20  | 0.00  | 6.0     | Pro130  | 0     | 6.0     | Lys313  | -1    | 7.5     |         |         |        |     |     |
| Asp21   | 0.00   | 7.5   | Ile131  | 0       | 7.5   | Ala314  | 0       | 5.5   |         |         |         |        |     |     |
| Gln312  | 1.00   | 7.0   | Asn132  | 0       | 5.0   | Val316  | 0       | 6     |         |         |         |        |     |     |
| Lys313  | -3.00  | 2.0   | Gln148  | -1      | 3.0   | Phe2287 | Tyr20   | -1    | 7.5     |         |         |        |     |     |
| Ala314  | 0.00   | 7.0   | Ser149  | 1       | 8.0   | Arg221  | -1      | 7     |         |         |         |        |     |     |
| Met2271 | Gly19  | 0.00  | 8.0     | Val171  | 1     | 8.0     | Trp272  | 0     | 7       |         |         |        |     |     |
| Tyr20   | -4.00  | 3.5   | Ser172  | 0       | 4.0   | Trp274  | -1      | 8     |         |         |         |        |     |     |
| Asp21   | -2.00  | 7.0   | Ile173  | -1      | 8.0   |         |         |       |         |         |         |        |     |     |
| Gln44   | -2.00  | 8.0   | Thr174  | -1      | 7.0   |         |         |       |         |         |         |        |     |     |
| Ser290  | -2.00  | 6.5   | Ser190  | 1       | 6.5   |         |         |       |         |         |         |        |     |     |
| Asn292  | -1.00  | 7.5   | Tyr222  | 0       | 5.0   |         |         |       |         |         |         |        |     |     |
| Gln312  | -2.00  | 7.0   | Leu224  | 1       | 8.0   |         |         |       |         |         |         |        |     |     |
| Lys313  | -4.00  | 3.0   | Trp272  | 1.00    | 6.0   |         |         |       |         |         |         |        |     |     |
| Ala314  | -1.00  | 4.5   | Trp274  | 0.00    | 6.0   |         |         |       |         |         |         |        |     |     |
| Val316  | 0.00   | 8.0   |         |         |       |         |         |       |         |         |         |        |     |     |

Table S4 – Calculated interaction energy (kcal.mol<sup>-1</sup>) of individual mLST8 amino acid residues along the interface of mTOR-mLST8 MD structure.

| mLST8  | mTOR    | E      | d   | mLST8  | mTOR    | E     | d   | mLST8  | mTOR    | E     | d   | mLST8  | mTOR    | E  | d   |
|--------|---------|--------|-----|--------|---------|-------|-----|--------|---------|-------|-----|--------|---------|----|-----|
| Ala129 | Leu2280 | 0.00   | 8.0 | Gln148 | Leu2278 | 0.00  | 7.0 | Leu224 | Leu2280 | 1.00  | 8.0 | Thr220 | Met1437 | -1 | 8   |
| Ala176 | Met2281 | -1.00  | 8.0 |        | Thr2279 | -1.00 | 5.0 |        | Met2281 | -5.00 | 3.5 |        | Lys1438 | 1  | 5   |
| Ala18  | Gln2282 | 0.00   | 7.5 |        | Leu2280 | -1.00 | 3.0 |        | Gln2282 | 1.00  | 6.0 |        | His1439 | -1 | 5   |
| Ala218 | Glu1442 | 0.00   | 6.5 |        | Met2281 | -2.00 | 4.5 |        | Val2284 | 0.00  | 6.0 |        | Glu1442 | 0  | 8   |
| Ala223 | Met2281 | 0.00   | 6.0 |        | Gln2282 | 0.00  | 7.5 |        | Glu2285 | 0.00  | 5.5 |        | Glu2526 | 0  | 8   |
| Ala240 | Met2281 | -1.00  | 7.0 |        | Lys2283 | 0.00  | 8.0 |        | Glu2288 | 0.00  | 8.0 |        | Lys2530 | 0  | 4   |
|        | Val2284 | 0.00   | 6.0 |        | Val2284 | 0.00  | 8.0 | Leu254 | Glu1442 | 0.00  | 5.0 | Thr23  | Pro2273 | 0  | 7.5 |
|        | Glu2285 | 0.00   | 5.5 |        | Glu2536 | 0.00  | 6.5 | Leu293 | His2289 | 0.00  | 8.0 | Thr243 | Glu1442 | -1 | 7.5 |
|        | Glu2288 | 0.00   | 4.0 |        | Gln2540 | 0.00  | 6.5 | Lys245 | Glu1442 | -2.00 | 4.5 | Trp247 | Glu1442 | 1  | 7.5 |
|        | His2535 | 0.00   | 7.0 | Gln225 | Met2281 | 0.00  | 6.5 | Lys261 | Gly1407 | 0.00  | 7.0 | Trp272 | Thr2279 | 0  | 8   |
| Ala314 | Arg2270 | 0      | 7.0 | Gln242 | Glu2285 | 0.00  | 7.0 |        | Pro1408 | 0.00  | 7.0 |        | Leu2280 | 1  | 6   |
|        | Met2271 | -1     | 4.5 |        | Glu2288 | 0.00  | 7.5 |        | Tyr1435 | -1.00 | 7.5 |        | Met2281 | 0  | 3   |
|        | Ala2272 | 0      | 5.5 |        | His2289 | 0.00  | 6.5 |        | His1439 | 1.00  | 6.0 |        | Gln2282 | 0  | 5   |
|        | Pro2273 | 1      | 7.0 | Gln312 | Arg2270 | 1.00  | 7.0 |        | Phe1440 | -1.00 | 4.0 |        | Lys2283 | -1 | 6.5 |
|        | Leu2278 | 0      | 8.0 |        | Met2271 | -2.00 | 7.0 |        | Leu1443 | 0.00  | 5.5 |        | Val2284 | -4 | 2.5 |
|        | Gln2282 | 0      | 6.5 | Gln41  | Pro2273 | 0.00  | 7.0 | Lys313 | Ile2267 | 0.00  | 6.5 |        | Glu2285 | -5 | 2.5 |
|        | Glu2285 | 0      | 4.5 | Gln44  | Met2271 | -2.00 | 8.0 |        | Met2268 | -1.00 | 7.0 |        | Val2286 | 0  | 6.5 |
|        | Val2286 | 0      | 5.5 |        | Ala2272 | 0.00  | 5.0 |        | Leu2269 | 0.00  | 5.5 |        | Phe2287 | 0  | 7   |
|        | His2289 | 0      | 4.5 |        | Pro2273 | -2.00 | 3.0 |        | Arg2270 | -3.00 | 2.0 |        | Glu2288 | -8 | 2   |
| Ala47  | Thr2279 | 0      | 7.0 |        | Asp2274 | 0.00  | 3.5 |        | Met2271 | -4.00 | 3.0 |        | His2289 | 0  | 4.5 |
|        | Gln2282 | -1     | 6.5 |        | Tyr2275 | 1.00  | 6.5 |        | Ala2272 | -1.00 | 3.5 |        | Asn2292 | 0  | 6.5 |
| Ala60  | Gln2282 | 0      | 7.5 |        | Asp2276 | 0.00  | 6.5 |        | Pro2273 | -1.00 | 4.0 |        | His2535 | -1 | 5   |
| Ala89  | Thr2279 | -1     | 3.5 |        | His2277 | -1.00 | 2.5 |        | Asp2274 | -1.00 | 7.5 |        | Glu2536 | 0  | 6   |
|        | Leu2280 | 0      | 7.0 |        | Leu2278 | -1.00 | 3.0 |        | Val2286 | -1.00 | 7.5 |        | Cys2539 | 0  | 7.5 |
|        | Met2281 | -1     | 5.5 |        | Thr2279 | 0.00  | 4.5 |        | His2289 | 2     | 7.5 | Trp274 | Leu2278 | -1 | 7.5 |
|        | Gln2282 | 0      | 6.0 |        | Gln2282 | 0.00  | 4.0 | Lys86  | Asp2276 | -2    | 7.5 |        | Thr2279 | 0  | 6.5 |
| Arg221 | Lys1438 | 2      | 7.5 |        | Lys2283 | 0.00  | 8.0 |        | His2277 | 1     | 6.0 |        | Leu2280 | 0  | 6   |
|        | His1439 | 1      | 7.0 |        | Val2286 | 0.00  | 7.5 |        | Leu2278 | 0     | 7.5 |        | Met2281 | -1 | 2.5 |
|        | Met2281 | -1     | 8.0 | Gln63  | His2277 | -1.00 | 5.5 |        | Thr2279 | 0     | 6.5 |        | Gln2282 | -3 | 3   |
|        | Val2284 | -1     | 3.5 | Glu105 | Asp2276 | 1.00  | 6.5 | Met273 | Glu2285 | -2.00 | 6.0 |        | Lys2283 | -1 | 6   |
|        | Glu2285 | -1     | 6.0 |        | His2277 | -3.00 | 5.0 | Pro130 | Leu2278 | 0.00  | 8.0 |        | Val2284 | 0  | 5.5 |
|        | Phe2287 | -1     | 7.0 |        | Leu2278 | 1.00  | 4.5 |        | Thr2279 | 0.00  | 6.0 |        | Glu2285 | -2 | 3   |
|        | Glu2288 | -15.00 | 2.0 |        | Thr2279 | -1.00 | 3.5 |        | Leu2280 | 0.00  | 6.0 |        | Val2286 | 0  | 5.5 |
|        | His2289 | 1      | 7.5 |        | Leu2280 | 0.00  | 5.0 |        | Met2281 | -2.00 | 8.0 |        | Phe2287 | -1 | 8   |
|        | Val2291 | -1     | 7.5 |        | Met2281 | -2.00 | 8.0 | Pro169 | Arg2511 | -1.00 | 8.0 |        | Glu2288 | 0  | 7.5 |
|        | Asn2292 | 0      | 6.5 |        | Lys2283 | -2.00 | 7.5 |        | Asp2512 | 1.00  | 7.0 |        | His2289 | 1  | 6   |
|        | Lys2530 | 2      | 5.0 | Glu168 | Asp2516 | 2.00  | 8.0 |        | Phe2513 | 0.00  | 5.0 | Tyr20  | Met2268 | -3 | 8   |
|        | Thr2533 | 1      | 6.0 | Glu170 | Arg2503 | -1.00 | 7.0 |        | Ser2514 | 1.00  | 5.0 |        | Leu2269 | -1 | 7.5 |
|        | Ser2534 | 0      | 4.5 |        | Arg2511 | -1.00 | 7.0 |        | His2515 | -1.00 | 5.0 |        | Arg2270 | 0  | 6   |
|        | His2535 | 4      | 3.0 |        | Asp2512 | 5.00  | 3.5 |        | Asp2516 | 0.00  | 5.0 |        | Met2271 | -4 | 3.5 |

|        |         |           |        |         |           |        |         |           |        |         |        |
|--------|---------|-----------|--------|---------|-----------|--------|---------|-----------|--------|---------|--------|
|        | Glu2536 | -1 4.5    |        | Phe2513 | 3.00 3.5  |        | Asp2517 | 0.00 8.0  |        | Ala2272 | -3 3   |
|        | Asn2537 | 0 7.0     |        | Ser2514 | -1.00 6.0 | Pro217 | Glu1442 | 1.00 8.0  |        | Pro2273 | -2 2.5 |
|        | Leu2538 | 0 7.5     |        | His2515 | -1.00 7.0 | Pro265 | Lys1406 | 0.00 8.0  |        | Asp2274 | -1 5.5 |
| Arg270 | Gln1405 | 1 7.0     |        | Leu2527 | -1.00 7.5 |        | Gly1407 | -0.20 6.0 |        | Tyr2275 | 0 7.5  |
|        | Lys1406 | 1 5.0     |        | Gln2531 | -1.00 5.5 |        | Pro1408 | -2.60 3.5 |        | His2277 | 0 7    |
|        | Gly1407 | -1 5.5    |        | Glu2536 | 2.00 8.0  |        | Thr1409 | 0.00 3.0  |        | Leu2278 | -2 3   |
|        | Glu2285 | 0 6.5     | Glu257 | Glu1442 | 1.00 5.0  |        | Pro1410 | -2.00 2.5 |        | Thr2279 | 0 6    |
|        | Glu2288 | -1 6.5    |        | Leu1443 | 0.00 7.5  |        | Ala1411 | -0.30 6.5 |        | Met2281 | -3 6.5 |
|        | His2289 | 1.00 5.5  | Glu267 | Glu1403 | 1.00 7.5  |        | Ile1412 | 0.10 7.0  |        | Gln2282 | -3 2   |
|        | Asn2292 | 0.00 5.0  |        | Phe1404 | 1.00 7.0  |        | Leu1413 | -0.40 5.0 |        | Lys2283 | -1 5.5 |
|        | Asn2293 | 0.00 6.0  |        | Gln1405 | 0.00 6.5  |        | Tyr1435 | 0.00 6.0  |        | Val2284 | 0 7.5  |
| Asn132 | Thr2279 | -1.00 5.0 |        | Lys1406 | -1.00 3.0 |        | Ala1436 | 0.00 7.5  |        | Glu2285 | 0 4    |
|        | Leu2280 | 0.00 5.0  |        | Gly1407 | -1.00 2.5 |        | His1439 | 0.00 5.5  |        | Val2286 | -2 3   |
|        | Met2281 | -1 3.0    |        | Pro1408 | -0.30 4.5 |        | Phe1440 | -2.70 3.0 |        | Phe2287 | -1 7.5 |
|        | Gln2282 | 0 7.5     |        | Thr1409 | 0.00 7.0  |        | Leu1443 | -1.00 3.5 |        | His2289 | 0 6.5  |
|        | Glu2536 | -1.00 8.0 |        | Pro1410 | 0.00 7.5  |        | Glu1444 | -1.00 8.0 | Tyr222 | Leu2280 | 0 5    |
| Asn189 | Met2281 | -1.00 7.5 |        | Ile1412 | -0.60 8.0 |        | Trp1449 | 0.00 8.0  |        | Met2281 | -3 3.5 |
| Asn193 | Lys2530 | 0.00 6.5  |        | Tyr1435 | 0 5.5     | Ser149 | Leu2280 | 1.00 8.0  |        | Gln2282 | 1 8    |
| Asn264 | Glu1403 | -1.00 6.5 |        | His1439 | 0 7.5     | Ser172 | Thr2279 | 0.00 8.0  |        | Lys2283 | 0 8    |
|        | Phe1404 | 0.00 7.5  |        | Phe1440 | 0 5.5     |        | Leu2280 | 0.00 4.0  |        | Val2284 | -2 3   |
|        | Lys1406 | 0.00 4.5  | Gly103 | Thr2279 | 0.2 7.5   |        | Met2281 | -1.00 4.0 |        | Glu2285 | 0 7    |
|        | Gly1407 | -2.00 3.0 | Gly104 | Thr2279 | 1 6.5     |        | Val2284 | -1.00 8.0 |        | Glu2288 | 0 5.5  |
|        | Pro1408 | -1.00 3.0 | Gly146 | Met2281 | -1 7.5    |        | Glu2536 | 0.00 5.5  |        | Lys2530 | -1 7.5 |
|        | Thr1409 | -2.00 3.0 | Gly19  | Met2271 | 0 8.0     | Ser175 | Met2281 | -1.00 5.0 |        | Thr2533 | 0 8    |
|        | Pro1410 | 1.00 5.0  |        | Ala2272 | 0 7.0     | Ser190 | Leu2280 | 1.00 6.5  |        | Ser2534 | 0 4.5  |
|        | Ala1411 | 0.00 7.5  |        | Pro2273 | 0 5.5     |        | Met2281 | -1.00 5.5 |        | His2535 | 1 5    |
|        | Ile1412 | 0.00 5.5  |        | Leu2278 | 1 8.0     |        | Val2284 | 0.00 6.5  |        | Glu2536 | -11 2  |
|        | Leu1413 | -1.00 7.5 |        | Gln2282 | 1 5.5     |        | Lys2530 | 0.00 7.5  |        | Asn2537 | 0 6    |
|        | Tyr1435 | 0.00 8.0  | Gly192 | Lys2530 | 0 7.5     |        | Ser2534 | 0.00 7.5  |        | Cys2539 | -3 7   |
|        | Phe1440 | 0.00 6.0  | Gly263 | Lys1406 | 0 7.0     |        | Glu2536 | 0.00 4.5  |        | Gln2540 | 0 7    |
|        | Leu1443 | 0.00 7.5  |        | Gly1407 | -1 7.0    | Ser239 | Glu2285 | 0.00 7.5  | Tyr62  | Pro2273 | 0 7    |
| Asn292 | Met2271 | -1.00 7.5 |        | Pro1408 | 1 7.5     | Ser259 | Leu1443 | 0.00 8.0  |        | Asp2274 | -1 6   |
|        | Glu2285 | 0.00 8.0  |        | Thr1409 | 0 6.5     | Ser268 | Gln1405 | 1.00 8.0  |        | Asp2276 | 0 6.5  |
|        | His2289 | 0.00 5.5  |        | Pro1410 | 0 7.5     |        | Lys1406 | 0.00 6.5  |        | His2277 | -5 3   |
|        | Asn2293 | 1.00 8.0  | Gly266 | Glu1403 | 1 8.0     |        | Gly1407 | 0.00 5.5  |        | Leu2278 | 0 5.5  |
| Asn46  | Ala2272 | 0.00 7.5  |        | Phe1404 | 0 6.0     |        | Pro1408 | 0.00 7.0  |        | Thr2279 | 0 5.5  |
|        | Pro2273 | -1.00 7.5 |        | Gln1405 | 0 7.5     |        | Tyr1435 | 0.00 5.0  |        | Gln2282 | 0 7    |
|        | Asp2274 | 1.00 7.5  |        | Lys1406 | 0 6.0     |        | Lys1438 | 1.00 8.0  | Val171 | Leu2280 | 1 8    |
|        | His2277 | 0.00 5.0  |        | Gly1407 | -1 3.5    |        | His1439 | 1.00 5.0  |        | Lys2530 | 1 8    |
|        | Leu2278 | 0.00 4.0  |        | Pro1408 | -3.9 2.5  |        | Phe1440 | 0.00 6.5  |        | Glu2536 | 0 7.5  |
|        | Thr2279 | -1.00 3.0 |        | Thr1409 | -1 4.5    |        | Glu2288 | 0.00 7.5  | Val188 | Met2281 | -1 7   |
|        | Leu2280 | -1.00 7.0 |        | Pro1410 | -1 5.0    |        | Asn2292 | 0.00 5.0  | Val315 | Gln2282 | 1 7.5  |
|        | Met2281 | -1 7.0    |        | Ile1412 | 0 7.5     | Ser269 | His1439 | 0.00 7.5  |        | Glu2285 | 0 7.5  |
|        | Gln2282 | -4 2.0    |        | Leu1413 | 1 5.5     |        | Glu2285 | 0.00 7.5  |        | His2289 | 1 7.5  |
|        | Lys2283 | -1 7.0    |        | Tyr1435 | -1 3.5    |        | Glu2288 | 0.00 3.5  | Val316 | Met2271 | 0 8    |

|        |         |           |                |          |                |           |               |        |
|--------|---------|-----------|----------------|----------|----------------|-----------|---------------|--------|
| Asn87  | Asp2274 | -1 7.0    | Ala1436        | 0 7.5    | His2289        | 1.00 5.5  | Ala2272       | 0 6.5  |
|        | Tyr2275 | 0 7.5     | His1439        | 0 5.0    | Val2291        | 0.00 6.0  | Pro2273       | 1 7.5  |
|        | Asp2276 | 0 6       | Phe1440        | -1 3.0   | Asn2292        | -1.00 3.0 | Leu2278       | 0 6    |
|        | His2277 | -3.00 2.0 | Leu1443        | 0 7.0    | Asn2293        | 0.00 6.5  | Thr2279       | 0 6.5  |
|        | Leu2278 | -3.00 4.0 | Gly271 Glu2285 | -1 3.5   | His2535        | 0.00 5.5  | Met2281       | 1 7.5  |
|        | Thr2279 | -3.00 3.0 | Val2286        | 0 7.5    | Ser289 Glu2285 | 0.20 7.0  | Gln2282       | -1 2.5 |
|        | Leu2280 | -1.00 6.5 | Glu2288        | -1 5.0   | His2289        | 1.00 6.5  | Lys2283       | -1 7.5 |
|        | Gln2282 | 1.00 6.5  | His2289        | -1 3.5   | Ser290 Met2271 | -2.00 6.5 | Glu2285       | -1 5.5 |
|        | Lys2283 | 0.00 7.5  | Asn2292        | 0 6.0    | Ala2272        | 0.00 8.0  | Val2286       | 0 6    |
| Asp106 | Thr2279 | 0.00 8.0  | Asn2293        | 1 6.5    | Gln2282        | 0.00 7.5  | His2289       | 0 8    |
| Asp147 | Met2281 | -2.00 7.5 | Gly61 His2277  | 0 7.5    | Glu2285        | -9.00 2.0 | Val45 Ala2272 | 0 8    |
| Asp21  | Arg2270 | 0.00 7.5  | Thr2279        | 0 6.0    | Val2286        | -1.00 6.0 | Pro2273       | 0 6    |
|        | Met2271 | -2.00 7.0 | Gln2282        | 1 7.0    | Glu2288        | 0.00 6.5  | Leu2278       | 0 8    |
|        | Ala2272 | -1.00 6.5 | His219 His1439 | 1 7.5    | His2289        | 0.00 2.5  | Thr2279       | 0 8    |
|        | Pro2273 | 0.00 5.0  | Glu1442        | -1 7.0   | Ala2290        | 1.00 8.0  | Gln2282       | -1 4.5 |
| Asp241 | His1439 | -1.00 6.0 | Lys2530        | 1 7.5    | Asn2293        | 1 7       |               |        |
|        | Glu2285 | 1.00 8.0  | His22 Ala2272  | 1 7.0    | Ser43 Pro2273  | -2 5      |               |        |
|        | Glu2288 | 2.00 6.0  | Pro2273        | -1 3.0   | Asp2274        | -1 5.5    |               |        |
| Asp291 | Glu2285 | 1.00 6.5  | Asp2274        | -2 5.5   | His2277        | 0 6.5     |               |        |
|        | His2289 | -3.00 4.5 | His40 Pro2273  | -1 6.5   | Leu2278        | 1 8       |               |        |
|        | Asn2293 | 1.00 7.5  | His64 Pro2273  | 0 8.0    | Ser90 Thr2279  | -1 6.5    |               |        |
| Asp42  | Pro2273 | 0.00 5.0  | Ile131 Thr2279 | -1 6.0   | Met2281        | 0 6.5     |               |        |
|        | Asp2274 | 1.00 5.5  | Leu2280        | 0 7.5    | Thr174 Leu2280 | -1 7      |               |        |
|        | His2277 | -2.00 6.5 | Met2281        | -2 6.5   | Met2281        | -4 3      |               |        |
| Cys133 | Met2281 | 14.00 5.5 | Ile173 Leu2280 | -1 8.0   | Gln2282        | 0 8       |               |        |
| Cys317 | Gln2282 | -1.00 6.0 | Met2281        | -2 5.5   | Glu2536        | 0 7.5     |               |        |
|        |         |           | Ile88 His2277  | -1 8.0   | Thr191 Leu2527 | 1 7       |               |        |
|        |         |           | Thr2279        | 1 5.0    | Lys2530        | 0 4.5     |               |        |
|        |         |           | Gln2282        | 0.00 7.0 | Ser2534        | 0 8       |               |        |
|        |         |           |                |          | Glu2536        | 0 8       |               |        |

## Supplementary Methods

### MM-PBSA calculation

MM-PBSA calculations were performed using the `g_mmpbsa` code<sup>1</sup>. Ionic concentration was set to 0.150 M to match the MD simulation and atomic bondi radii was employed. Dielectric constant inside the protein was set to 40, while the dielectric constant for the solvent was set to 80. Linearized Poisson-Boltzmann equation was employed using grid resolution of 0.5 Å. Nonpolar solvation energy calculations were performed using the solvent accessible volume model with the number of dots per sphere set to 200. For calculations, 100 snapshots from the last 10ns of 100 ns simulations with `charmm27 amber99sb`<sup>2</sup> force fields were employed. Trajectory with `charmm27` force field is the same used for `mfcc-QM` calculations. Trajectory with `amber9sb` force field was

produced as follow: crystallographic structure of human mTOR-mLST8 complex (PDB ID: 4JSN)<sup>3</sup> was prepared using the PDB2PQR<sup>4</sup> server with the protonation state of residues calculated at the pH 7.2 with the help of the Propka<sup>5</sup> algorithm. Molecular dynamics simulation was performed using GROMACS 2019<sup>6,7</sup> package with amber99sb<sup>2</sup> force field. The simulation consisted in ~365,000 atoms which included the mTOR-mLST8 system, 114,042 water molecules, 345 ions Na<sup>+</sup> and 334 ions Cl<sup>-</sup>. Restraint was applied to the mTOR backbone (except for the loop making close contact with mLST8) while the whole mLST8 was free to move. Before the MD production step, the total energy minimization was accomplished by combining the steepest-descent algorithm followed by a step using conjugate gradient approach. Long-range electrostatics was modelled with the Particle Mesh Ewald (PME) method<sup>8</sup>, temperature coupling was done at 310.15 K in reference pressure of 1 bar with compressibility of  $4.5 \times 10^{-5}$ /bar applied for pressure control. TIP3P water model was used to describe water molecules<sup>9</sup> and bond links controlled by the LINCS algorithm<sup>10</sup>. The integration steps of all simulations were set to 2 fs. The production step generates a 100-ns trajectory, from which the last 10ns were extracted to be used during the MM-PBSA calculations.

## References

- 1 R. Kumari, R. Kumar and A. Lynn, *J. Chem. Inf. Model.*, , DOI:10.1021/ci500020m.
- 2 V. Hornak, R. Abel, A. Okur, B. Strockbine, A. Roitberg and C. Simmerling, *Proteins Struct. Funct. Genet.*, 2006.
- 3 H. Yang, D. G. Rudge, J. D. Koos, B. Vaidialingam, H. J. Yang and N. P. Pavletich, *Nature*, 2013, **497**, 217–23.
- 4 T. J. Dolinsky, J. E. Nielsen, A. A. McCammon and N. A. Baker, *Nucleic Acids Res.*, 2004, **32**, W665-667.
- 5 M. H. M. Olsson, C. R. Søndergaard, M. Rostkowski and J. H. Jensen, *J. Chem. Theory Comput.*
- 6 D. Van Der Spoel, E. Lindahl, B. Hess, G. Groenhof, A. E. Mark and H. J. C. Berendsen, *J. Comput. Chem.*, 2005, 26, 1701–1718.
- 7 and the G. development team M.J. Abraham, D. van der Spoel, E. Lindahl, B. Hess, .
- 8 U. Essmann, L. Perera, M. L. Berkowitz, T. Darden, H. Lee and L. G. Pedersen, *J. Chem. Phys.*, 1995, **103**, 8577–8593.
- 9 W. L. Jorgensen, J. Chandrasekhar, J. D. Madura, R. W. Impey and M. L. Klein, *J. Chem. Phys.*, 1983, **79**, 926–935.
- 10 B. Hess, H. Bekker, H. J. C. Berendsen and J. G. E. M. Fraaije, *J. Comput. Chem.*, 1997, **18**, 1463–1472.
