# Supplementary figures and images for: mTOR–mLST8 interaction: hot spot identification through quantum biochemistry calculations
Source: Royal Society of Chemistry journal article supplement (doi:10.1039/d0nj04099a), 2020-01-01

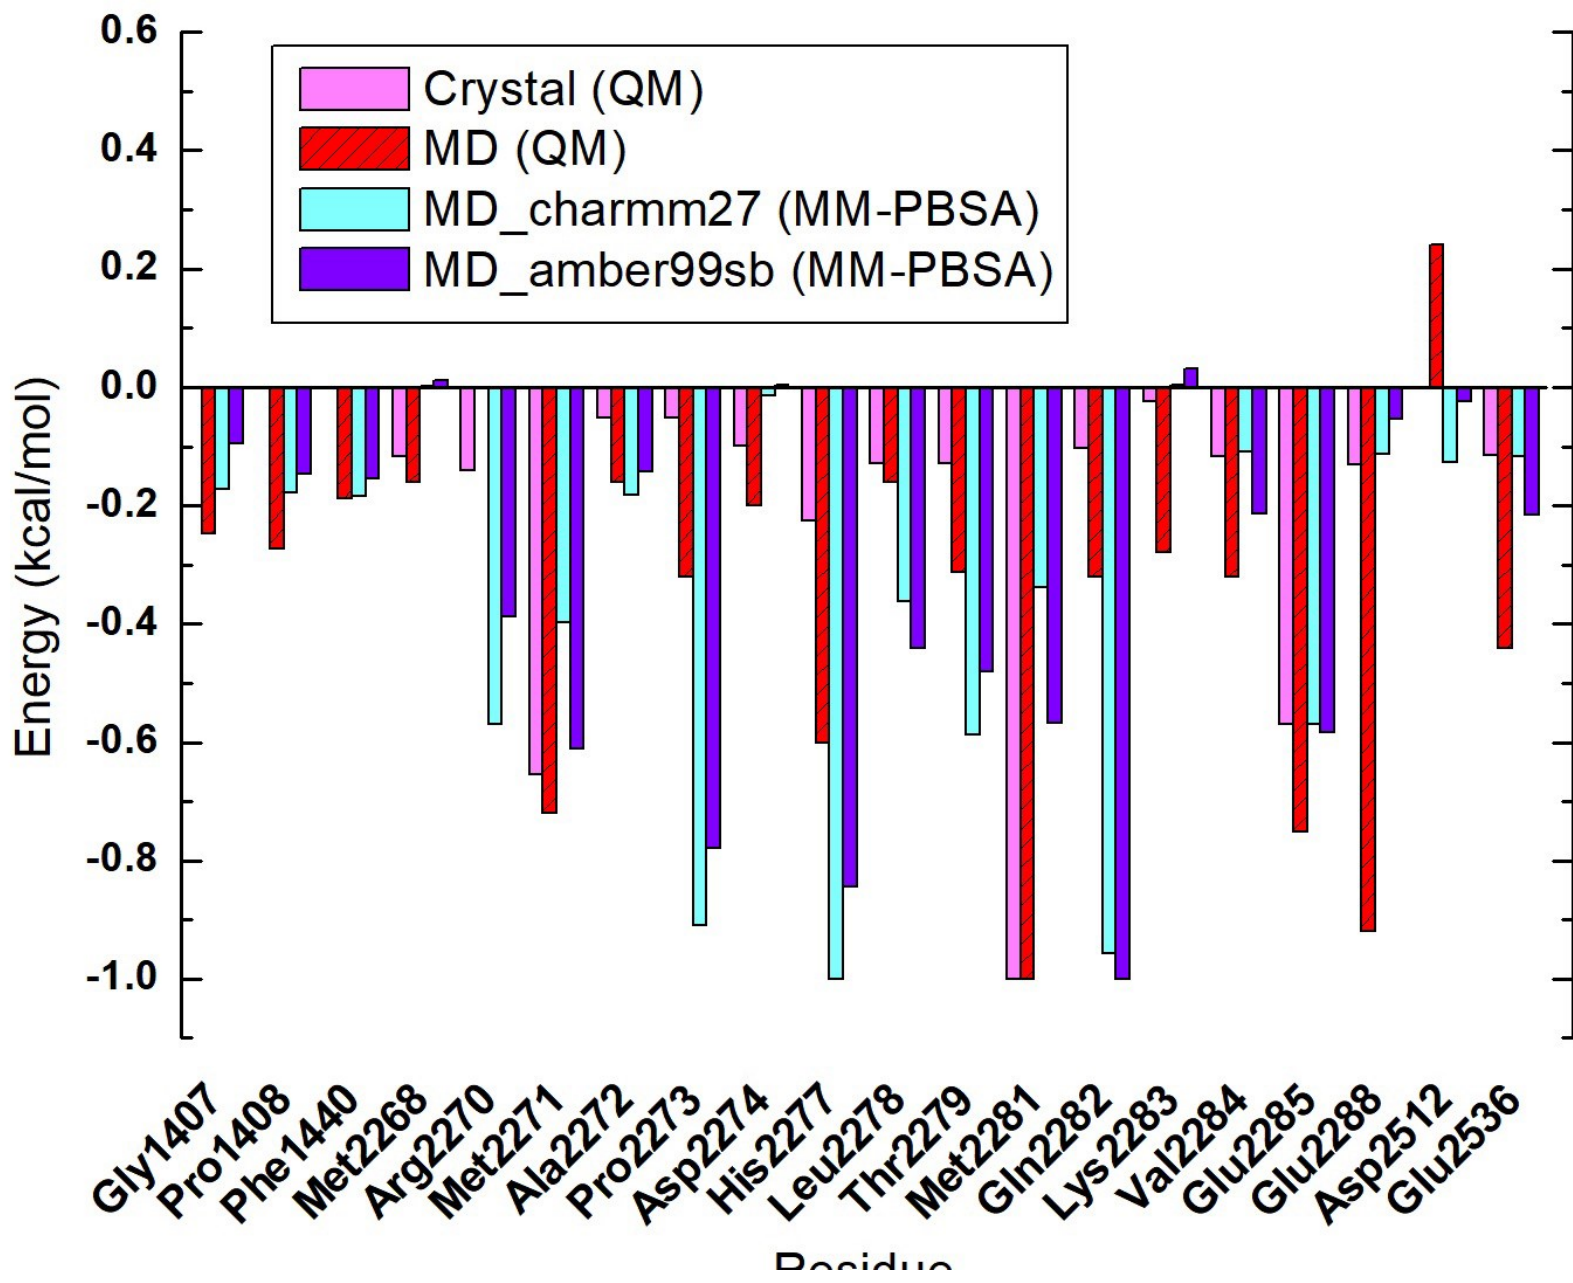

Supplement: d0nj04099a2.pdf [file d0nj04099a2.pdf]

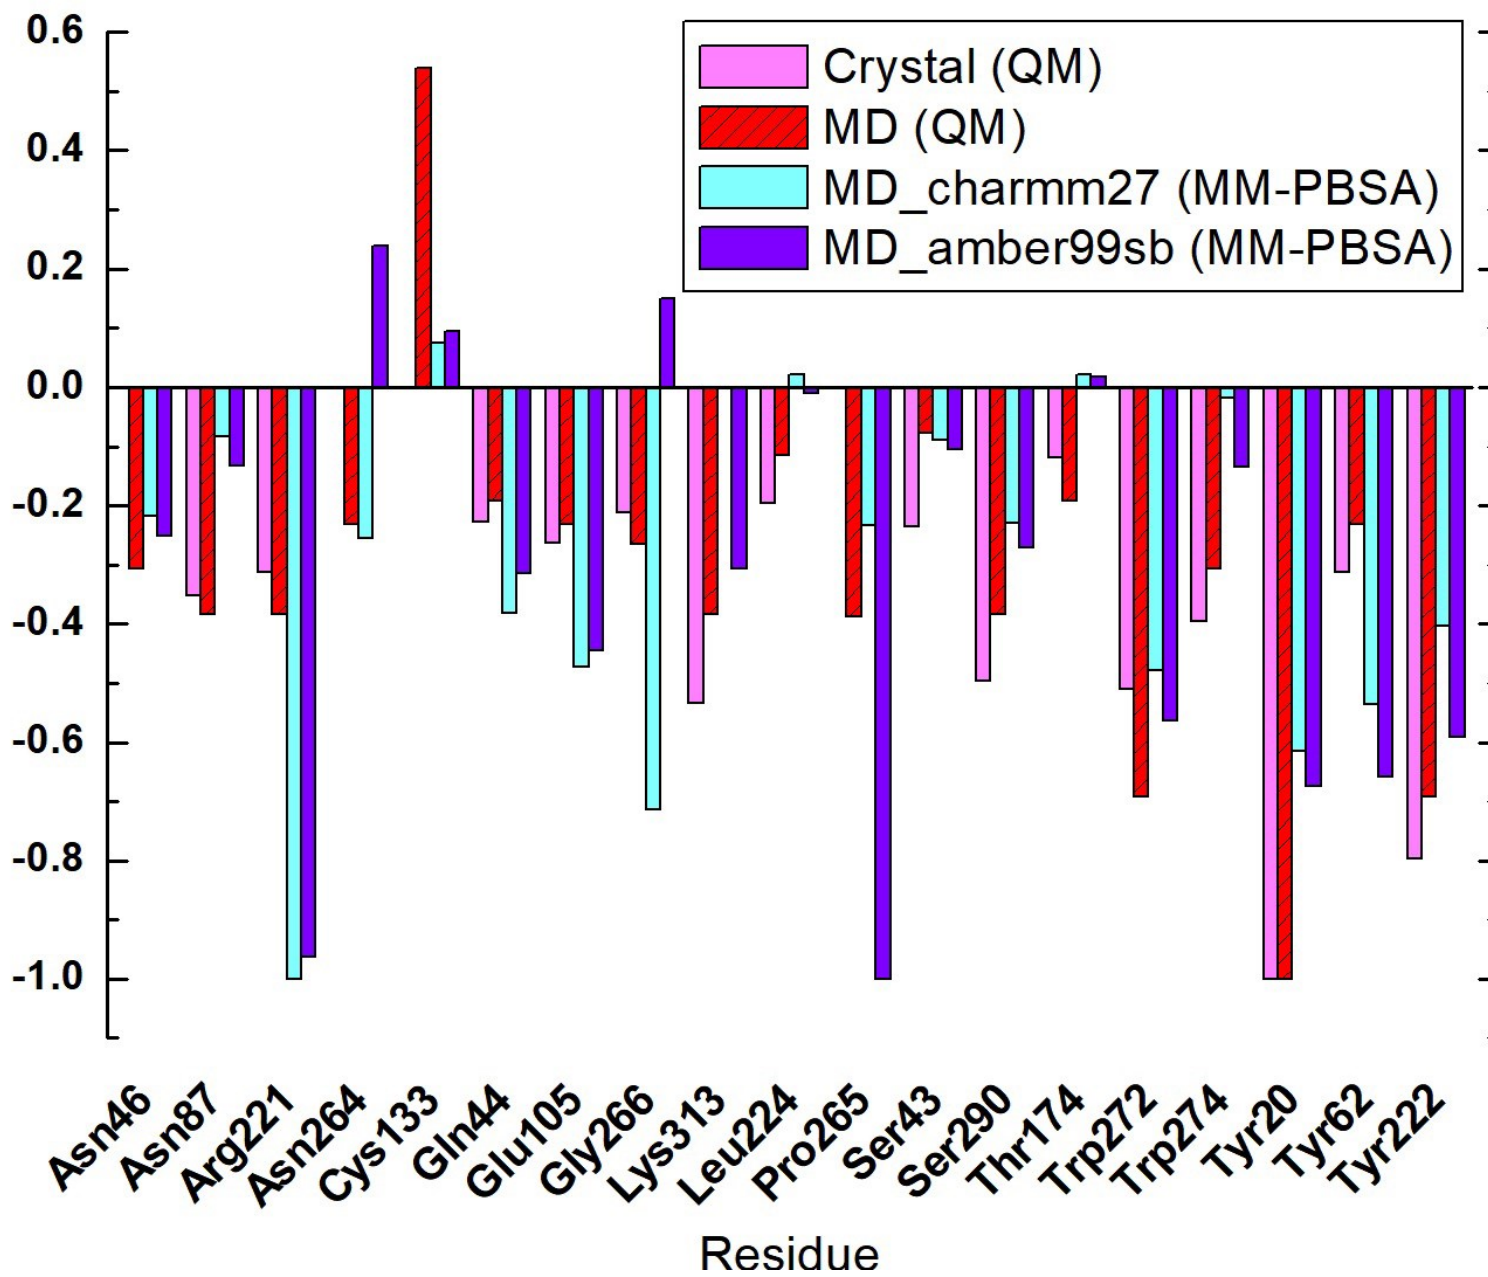

Supplement: d0nj04099a3.pdf [file d0nj04099a3.pdf]

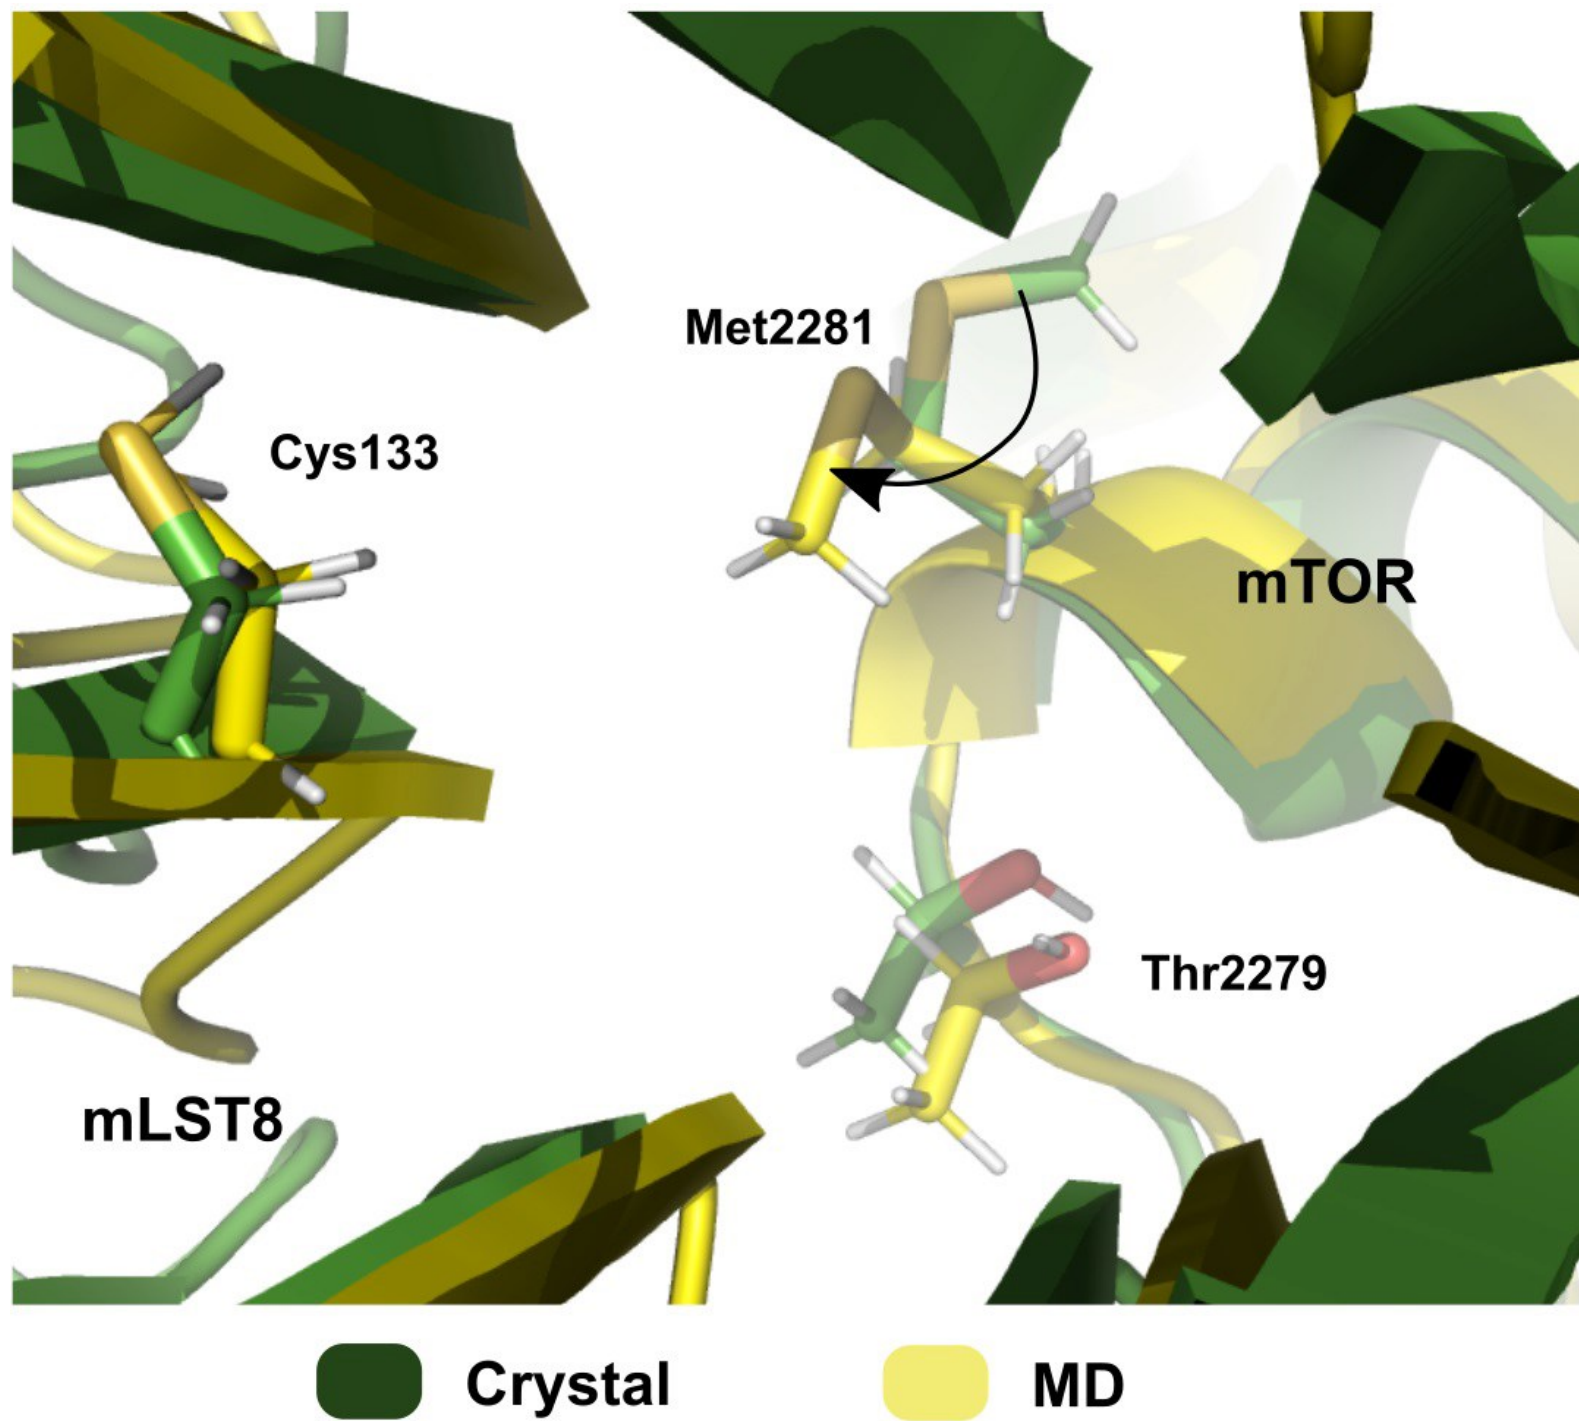

Supplement: d0nj04099a4.pdf [file d0nj04099a4.pdf]
